# Supplementary material for: Cell type-specific DNA methylation in neonatal cord tissue and cord blood: a 850K-reference panel and comparison of cell types
Source: PubMed Central journal article supplement — Epigenetics. 2018 Oct 11;13(9):941–58. doi: 10.1080/15592294.2018.1522929 (PMC6284779; doi:10.1080/15592294.2018.1522929), 2018-10-11
Supplement: kepi-13-09-1522929-s001.pdf [file kepi-13-09-1522929-s001.pdf]

**Cell-type specific DNA methylation  
in neonatal cord tissue and cord blood:  
a 850K-reference panel and comparison of cell-types**

Supplementary Material

Version 9

Last updated: 23 August 2018

# Contents

|                                                                                     |    |
|-------------------------------------------------------------------------------------|----|
| Supplementary A: Summary of QC and descriptive overview                             | 2  |
| Supplementary B: Benchmark reference panel in of cord tissue (sensitivity analysis) | 10 |
| Supplementary C: Benchmark reference panel in cord blood (sensitivity analysis)     | 20 |
| Supplementary D: Comparison of cord tissue vs. cord blood                           | 22 |
| Supplementary E: Pathway enrichment analysis for cell-type specific CpGs            | 26 |

Supplementary Figure A1: **Epigenome-wide DNA methylation profiling of 3 isolated cell-type populations from infant cord tissue (CT), 6 isolated cell-type populations from cord blood (CB) and 4 non-isolated infant tissues (unsorted single cell suspension (USCS) CT, frozen CT, CB unsorted leukocytes, CB buffy coat) from 14 infants, using the Infinium MethylationEPIC BeadChip.** Color in heatmap represents all samples which passed quality control, where excluded samples are shown in white. Each row represents each infant. Infants are labeled according to infant sex and ethnicity. For example, “F2-Chi” indicates that the second infant is female (F) and from Chinese (“Chi”) ethnic group; “M6-Mal” indicates that the sixth infant is male (M) and from Malay (“Mal”) ethnic group; “U” represents unknown. Each column represents each cell-type/tissue. Five populations from CT are shown in purple/pink/orange and prefixed with “CT” in the labels; 8 populations from CB are shown in blue/green and prefixed with “CB” in the labels. Non-isolated infant tissues are labeled with an asterisk. Samples are labeled as “Cell-Type:Infant”. Technical replicates are indicated with a “R”.

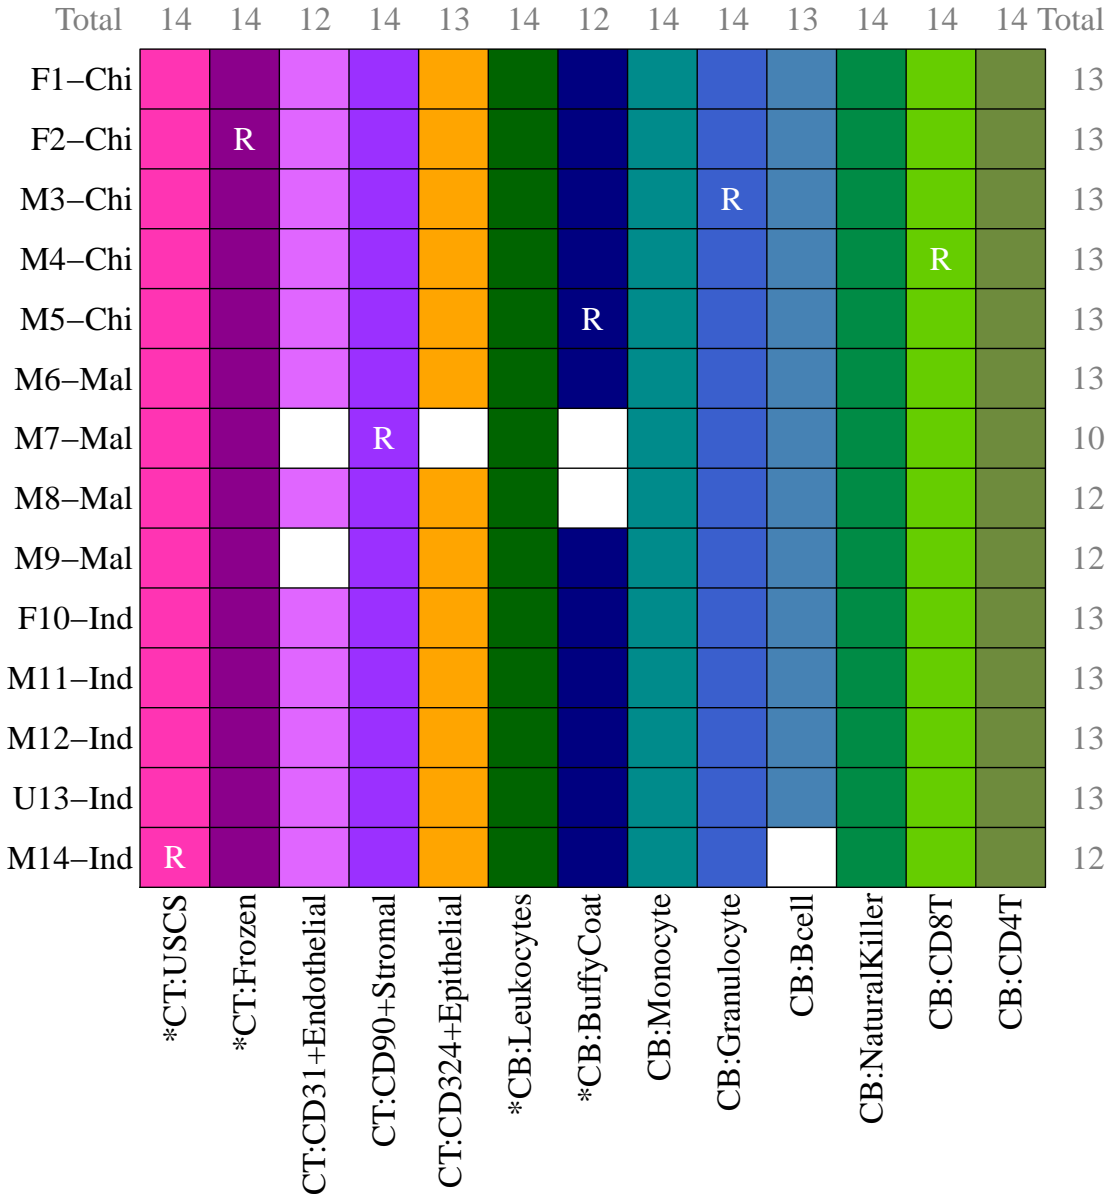

Supplementary Figure A2: **Summary of isolated cell-types and non-isolated tissues from infant cord tissue (CT) and cord blood (CB) examined in present study.** Five populations from CT are shown in purple/pink/orange and prefixed with “CT” in the labels; 8 populations from CB are shown in blue/green and prefixed with “CB” in the labels. Non-isolated infant tissues are labeled with an asterisk. From CT, the following 3 populations were isolated sequentially: CD90+ stromal cells, CD31+ endothelial cells, CD324+ epithelial cells. Note that the CD90+ stromal cell population may comprise of sub-populations of cell-types including MSCs, fibroblast cells and smooth muscle cells. From CB, the following 6 populations were sorted: CD15+ granulocytes, CD14+ monocytes, B cells, CD8+ T-cells, CD4+ T-cells, CD56+ Natural Killer (NK) cells. Besides the 9 isolated cell-types (3 from CT and 6 from CB), we also examined 4 non-isolated heterogeneous tissues: unsorted single cell suspension (USCS) CT, frozen CT, CB unsorted leukocytes and CB buffy coat. Cell-type composition was measured in USCS CT and CB unsorted leukocytes.

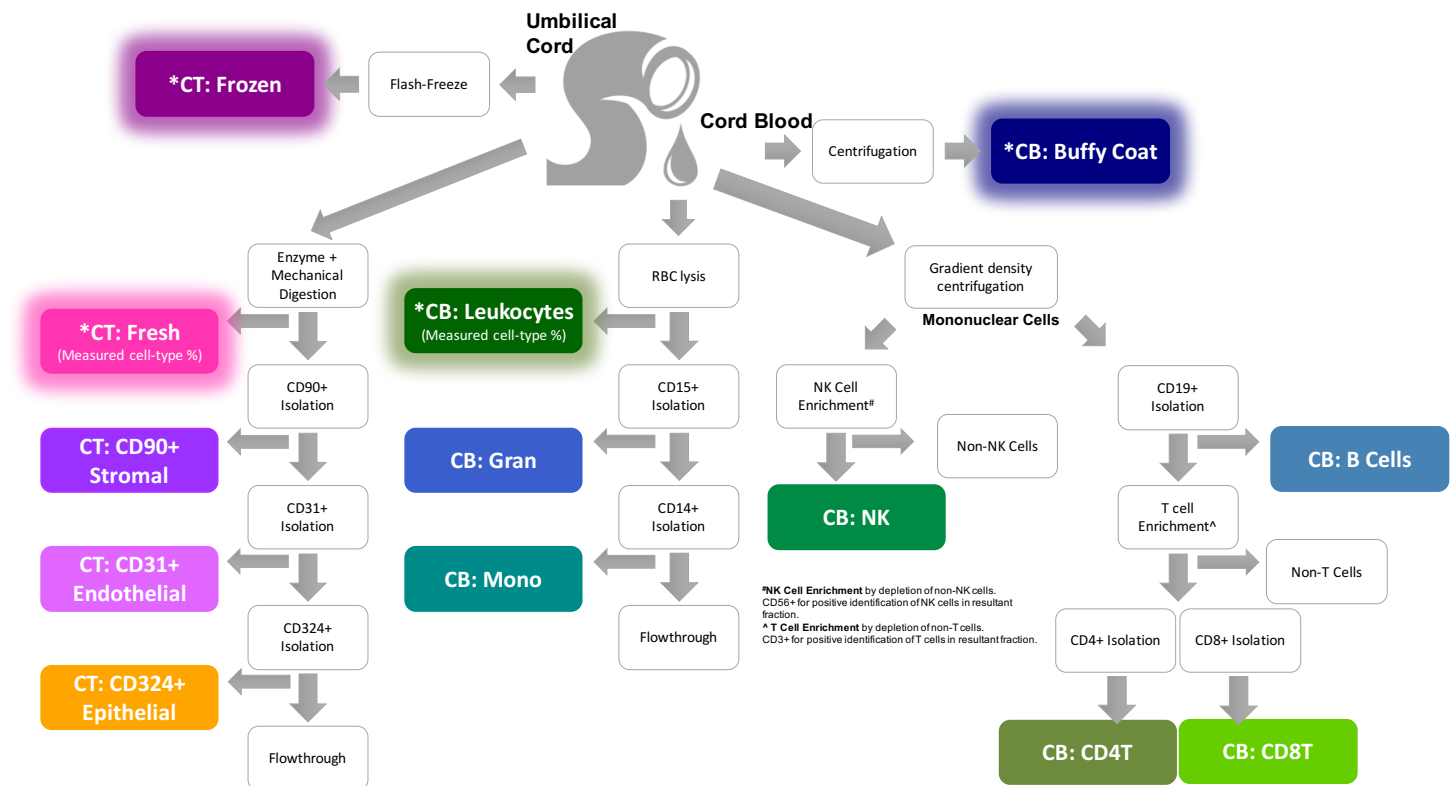

Supplementary Table A1: **Summary statistics on the 14 infant samples used in the current study.**

|                                | Count (%) | Mean (SD)      |
|--------------------------------|-----------|----------------|
| <b>Ethnicity</b>               |           |                |
| Chinese                        | 5 (36%)   |                |
| Malay                          | 4 (29%)   |                |
| Indian                         | 5 (36%)   |                |
| <b>Infant Sex</b>              |           |                |
| Female                         | 3 (21%)   |                |
| Male                           | 10 (71%)  |                |
| Unknown                        | 1 (7%)    |                |
| <b>Vaginal Delivery</b>        |           |                |
| Yes                            | 9 (64%)   |                |
| No                             | 5 (36%)   |                |
| <b>Birth weight (g)</b>        |           | 3372.4 (316.5) |
| <b>Birth length (cm)</b>       |           | 50.6 (2.6)     |
| <b>Maternal Age (years)</b>    |           | 32.0 (3.5)     |
| <b>Gestational Age (weeks)</b> |           | 39.3 (0.8)     |

Supplementary Table A2: **Number of CpGs that passed each sequential step of quality control.**

|                                             | No. of CpGs |
|---------------------------------------------|-------------|
| Initial                                     | 866,836     |
| No SNP at CpG site or single-base extension | 836,329     |
| Detection p-value < 0.01 in all samples     | 666,140     |
| On Chr 1-22                                 | 651,040     |
| Not cross-hybridized                        | 618,485     |
| Final Passed QC                             | 618,485     |

Supplementary Figure A3: **Concordance in DNA methylation values for 6 technical replicates.** Each row represents each sample and its corresponding technical replicate. Left panel gives spearman correlation and scatterplot with smoothed densities color representation of DNA methylation values, for replicate 1 (horizontal axis) and replicate 2 (vertical axis). Color represents density of CpG sites, with darker blue indicating higher density of CpG sites and lighter blue indicating lower density of CpG sites. Five hundred randomly selected CpG sites are shown as black points. Dotted green line gives  $y = x$  line, solid purple line gives best-fit line; overlapping lines indicate high concordance between replicates. Two sets of spearman correlation were computed: (i) excluding extremes (CpGs where raw DNA methylation  $< 20\%$  or  $> 80\%$  in both samples) or (ii) using all CpGs. Middle panel gives mean-centered pearson correlation and scatterplot of mean-centered DNA methylation values, for replicate 1 (horizontal axis) and replicate 2 (vertical axis). Each point represents a single CpG site. Two sets of mean-centered pearson correlation were computed: (i) excluding extremes (CpGs where raw DNA methylation  $< 20\%$  or  $> 80\%$  in both samples) or (ii) using all CpGs. To compute the mean-centered correlation, for each CpG, the mean of the CpG across all samples of the specific cell-type/tissue was subtracted from the observed DNA methylation value, before computing the mean-centered correlation. Right panel gives absolute difference in DNA methylation values between technical replicates.

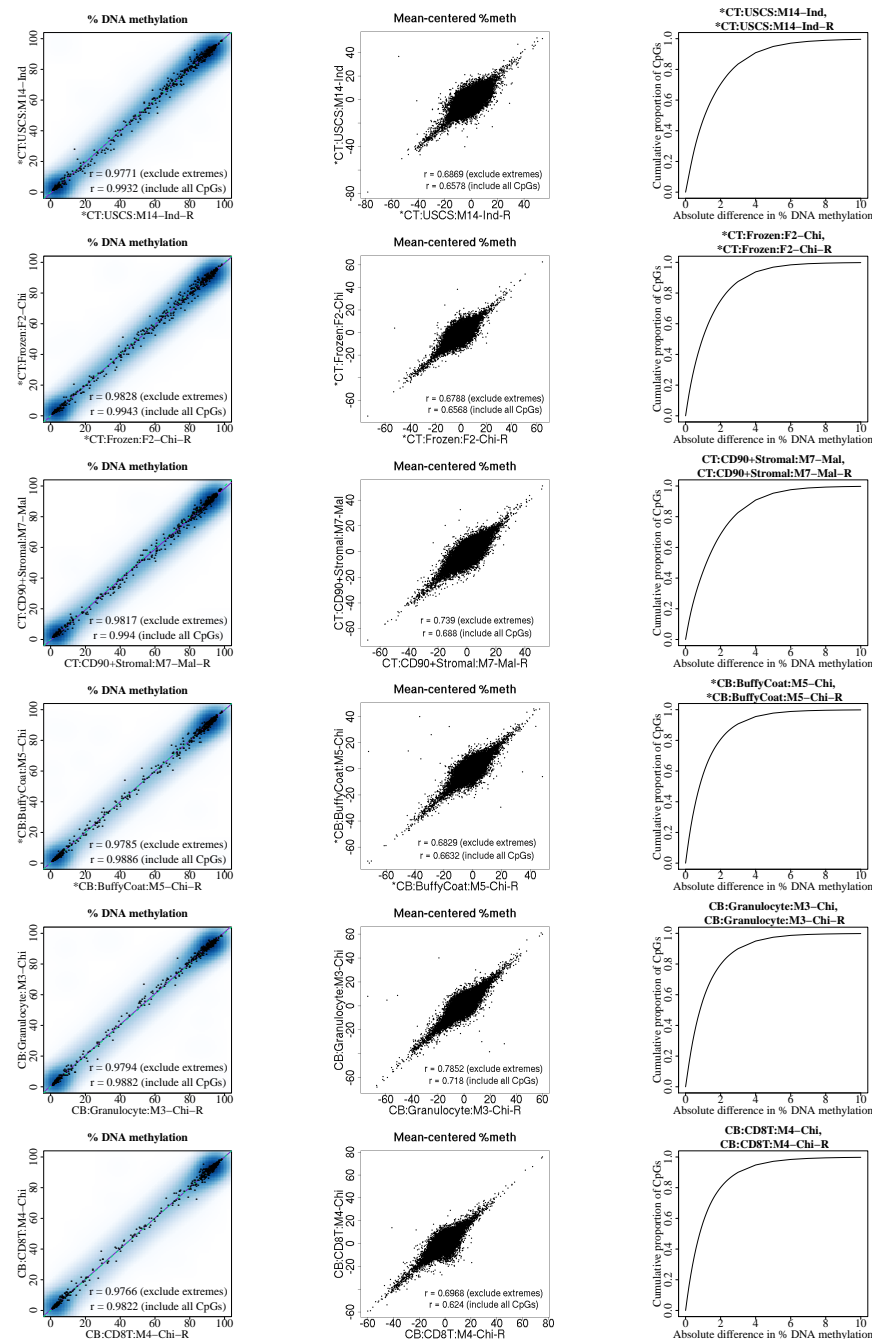

Supplementary Figure A4: Distribution of DNA methylation values for 9 isolated cell-type populations. Cord blood (dotted lines) had higher DNA methylation values compared to cord tissue (solid lines).

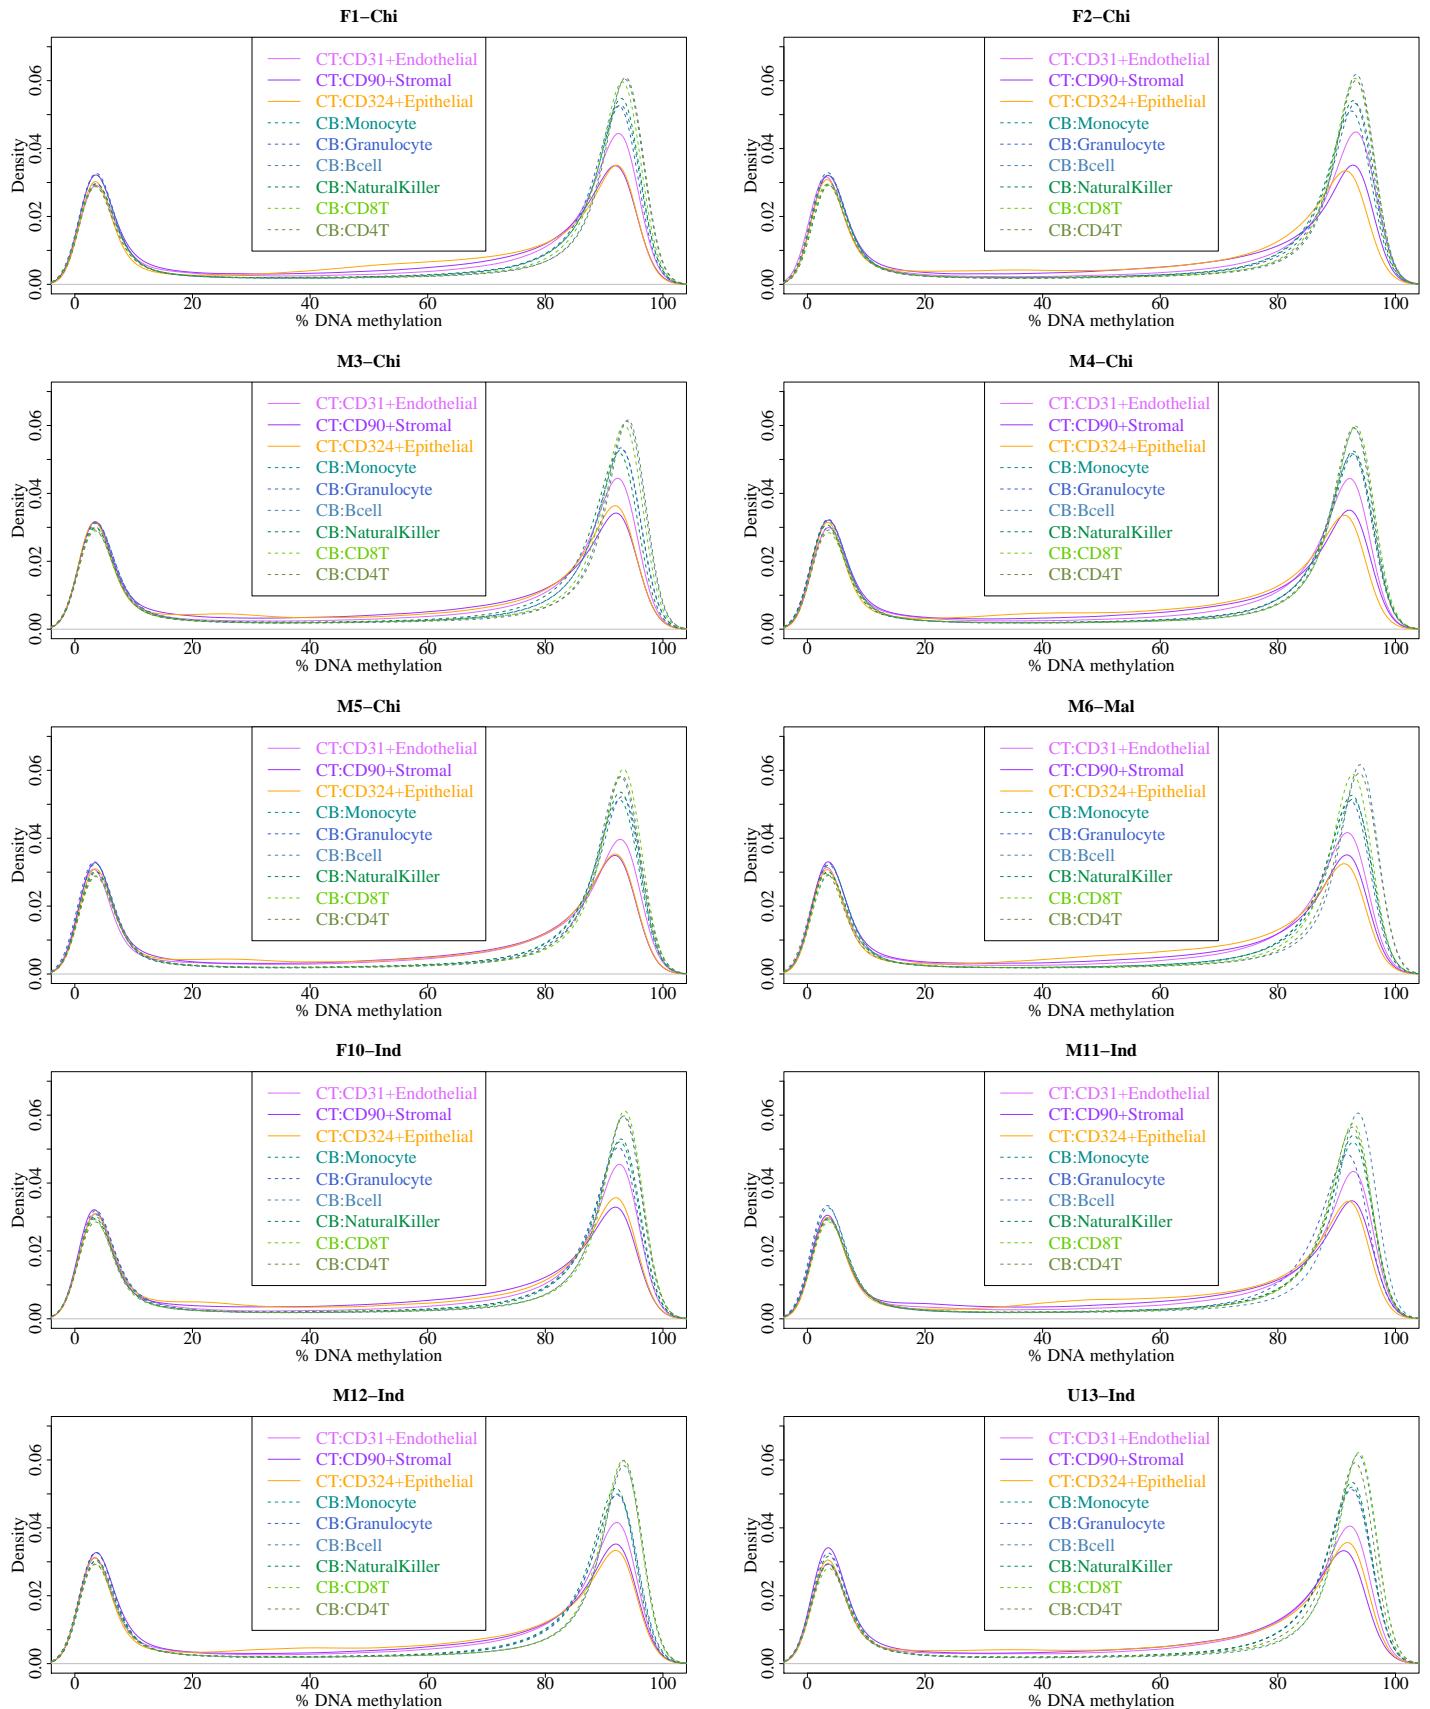

Supplementary Figure A5: Distribution of DNA methylation values for 4 non-isolated infant tissues. Cord blood (dotted lines) had higher DNA methylation values compared to cord tissue (solid lines).

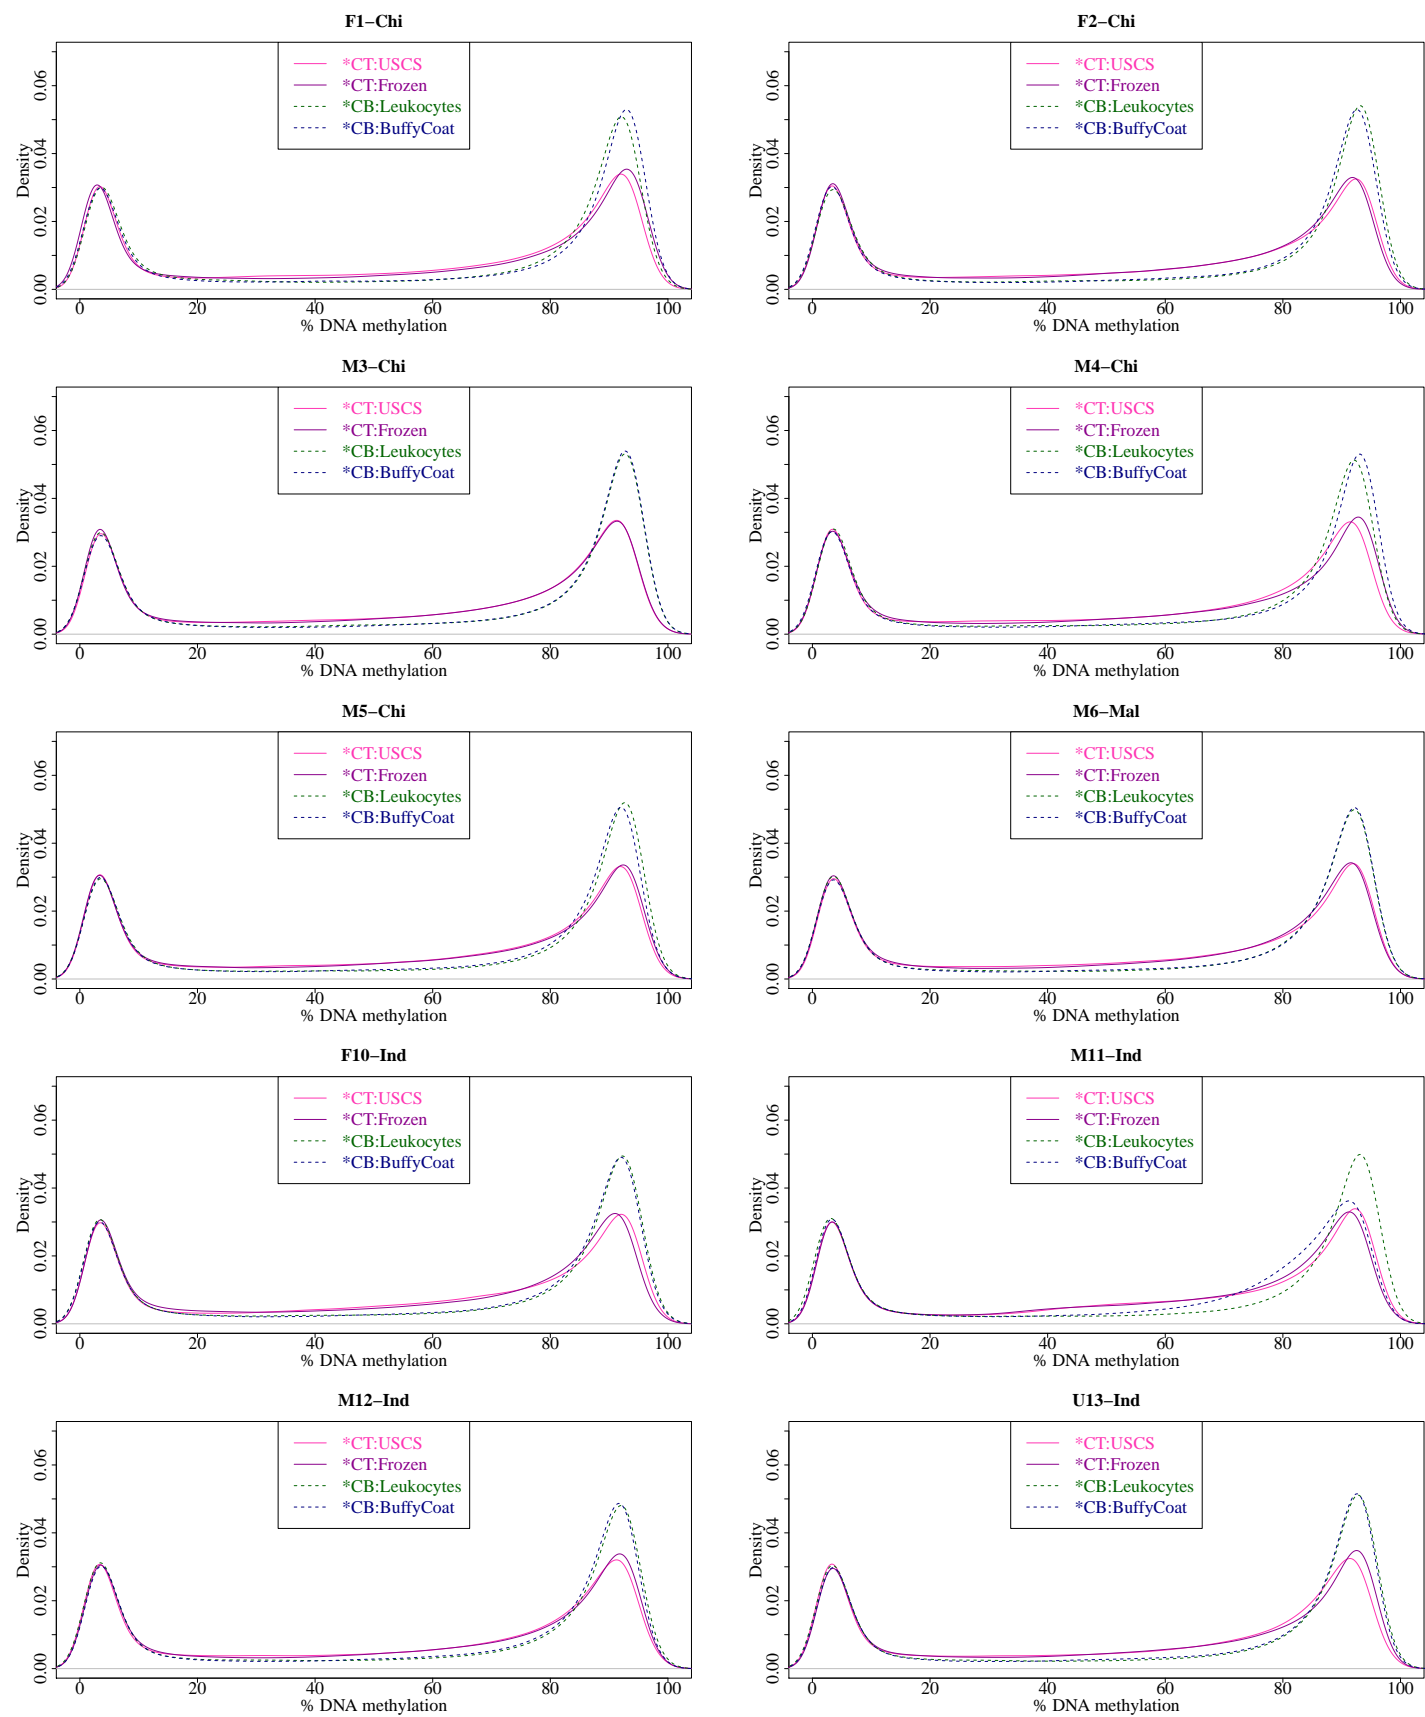

Supplementary Figure A6: Hierarchical clustering of 6 + 3 = 9 isolated cell-types that form cord tissue and blood reference panel, together with cord blood buffy coat, unsorted leukocytes and cord tissue (unsorted single cell suspension (USCS) and frozen). Technical replicates clustered together.

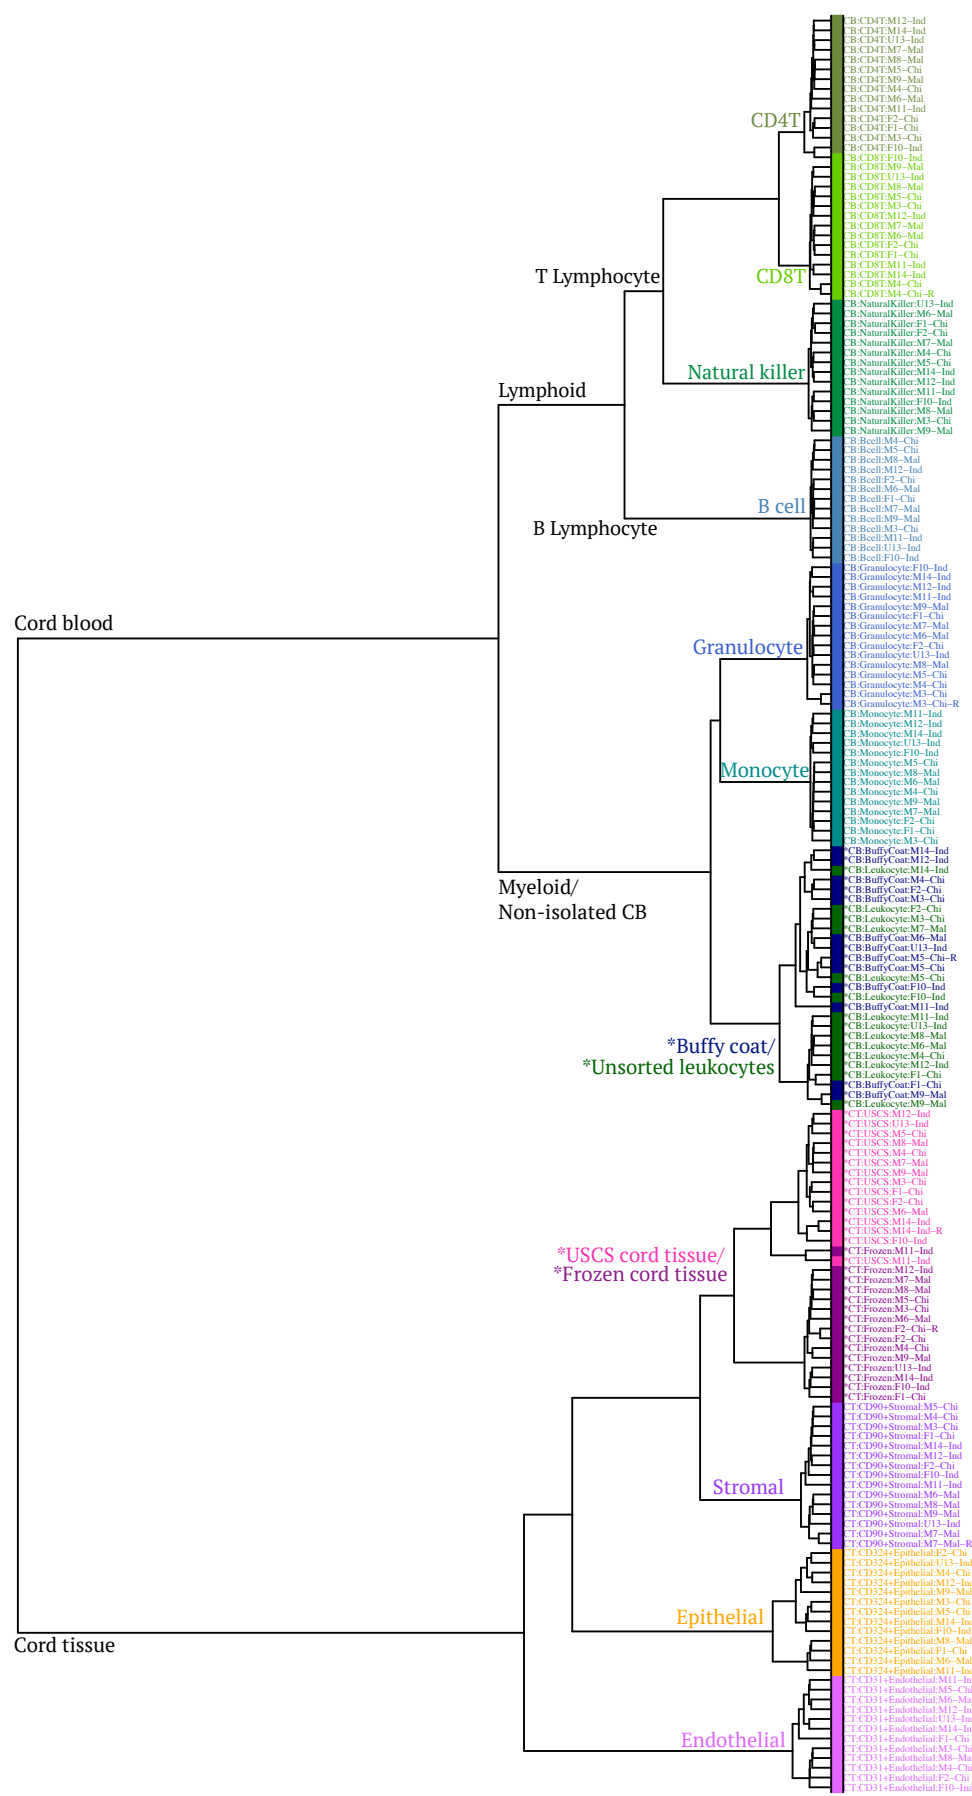

Supplementary Figure A7: **Principal components analysis (PCA) of  $6 + 3 = 9$  isolated cell-types that form cord tissue and blood reference panel, together with cord blood buffy coat, unsorted leukocytes and cord tissue (unsorted single cell suspension (USCS) and frozen).** Horizontal axis gives first PC. Vertical axis gives second to fifth PC.

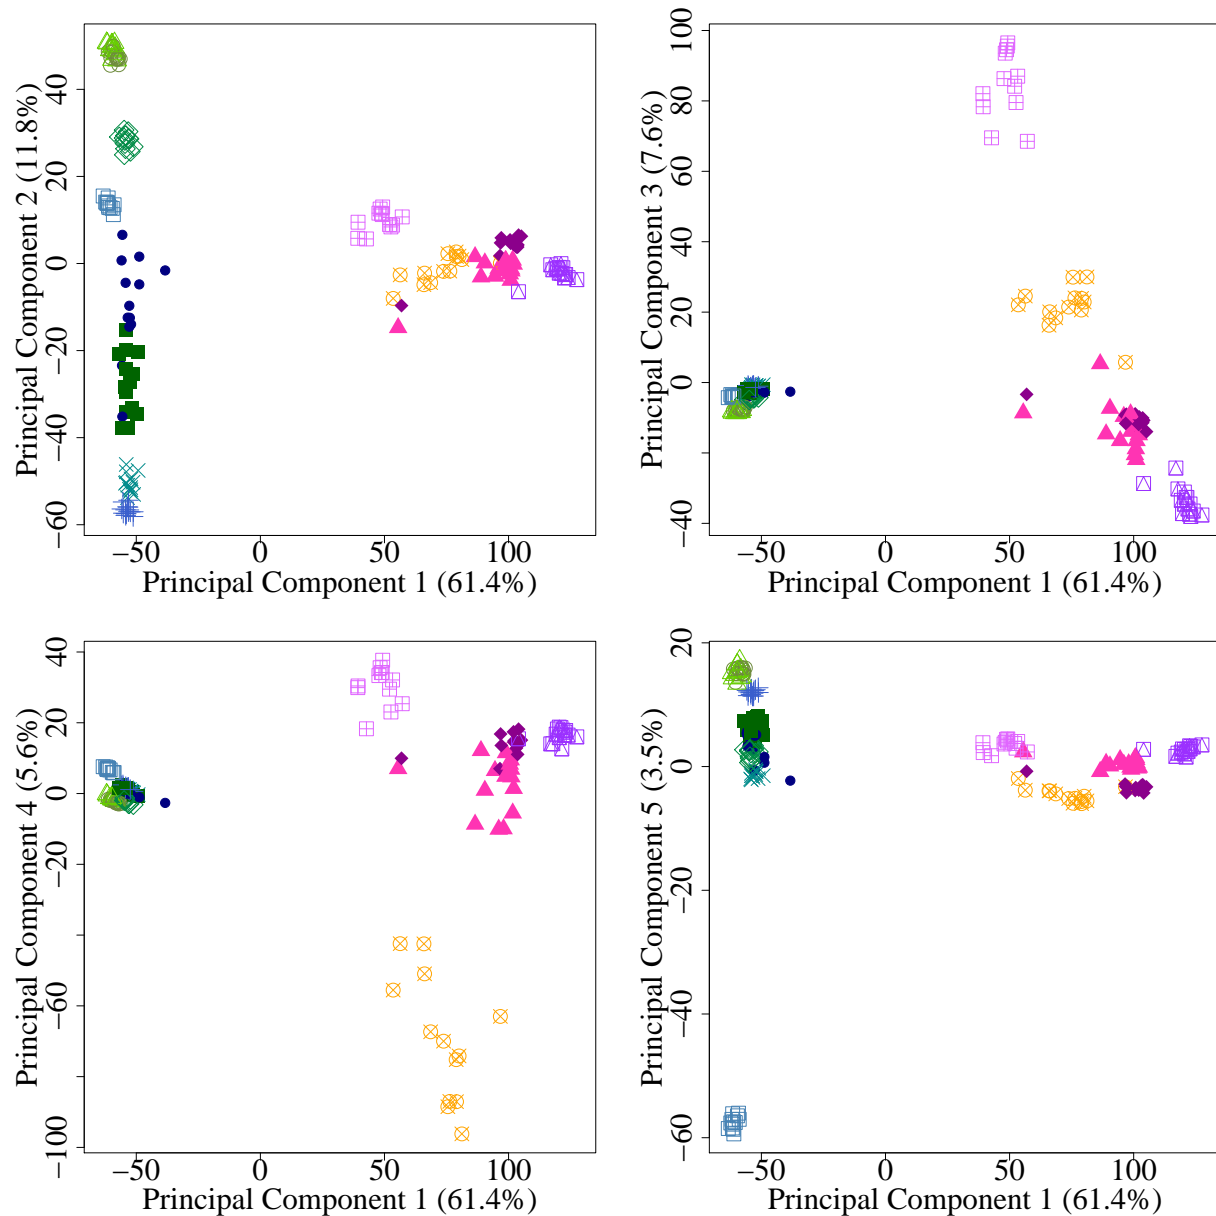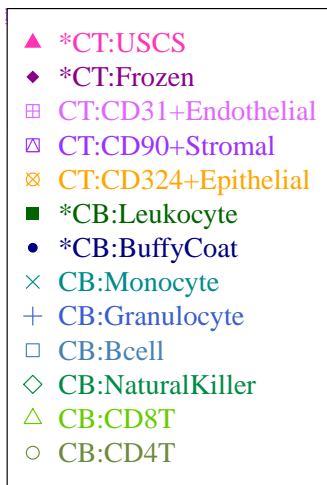

Supplementary Figure B1: **Benchmark reference panel: use of reference panel to capture cell-type composition in non-isolated frozen cord tissue (CT).** Scatterplots of measured cell-type % in unsorted single cell suspension (USCS) infant CT (vertical axis) vs. estimated cell-type % in *frozen* infant CT (horizontal axis). Vertical axis gives raw/unscaled measured cell-type % for all cell-types except stromal cells, where the unaccounted measured cell-type % were added to the raw/unscaled measured stromal % so that the 4 measured cell-type % sum to 100%. As cellular proportions could not be measured in frozen CT, estimated cellular proportions in *frozen* CT were compared with cellular proportions in *USCS* CT; however cellular composition in *USCS* and frozen CT can differ. Cellular proportions were estimated using the reference panel in the current study following the method described by Houseman *et al.* (2012), where pairwise t-tests were used to identify 1000 cell-type informative CpGs, prioritized by both p-values and directionality of effect sizes (500 CpGs each), that best distinguished each cell-type from the remainder cell-types. Granulocytes isolated from cord blood (CB) were included in the reference panel to capture CB contamination in CT.

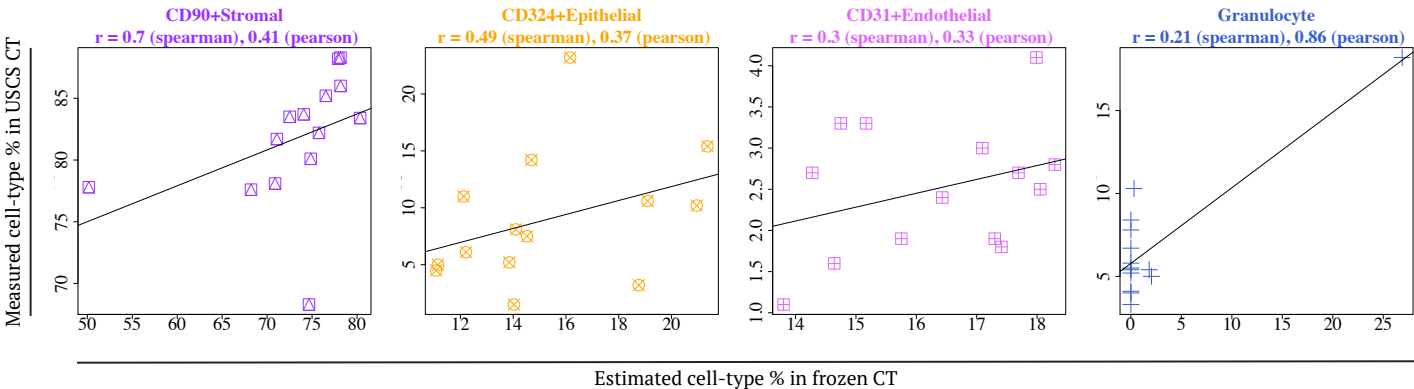

Supplementary Figure B2: **Benchmark reference panel - use of reference panel to capture cell-type composition in non-isolated unsorted single cell suspension (USCS) cord tissue (top panel) and non-isolated frozen cord tissue (bottom panel).** Scatterplots of measured cellular proportions in USCS infant CT (vertical axis) vs. estimated cellular proportions in *USCS* infant CT (horizontal axis, top panel) and *frozen* infant CT (horizontal axis, bottom panel), respectively. Vertical axis gives raw/unscaled measured cell-type % for all cell-types except stromal cells, where the unaccounted measured cell-type % were added to the raw/unscaled measured stromal % so that the 4 measured cell-type % sum to 100%. As cellular proportions could not be measured in frozen CT, estimated cellular proportions in *frozen* CT were compared with cellular proportions in *USCS* CT; however cellular composition in USCS and frozen CT can differ. Cellular proportions were estimated using the reference panel in the current study following the method described by Houseman *et al.* (2012), where pairwise t-tests were used to identify 1,000 cell-type informative CpGs, prioritized by only p-values, that best distinguished each cell-type from the remainder cell-types. Granulocytes isolated from cord blood (CB) was included in the reference panel to capture CB contamination in CT.

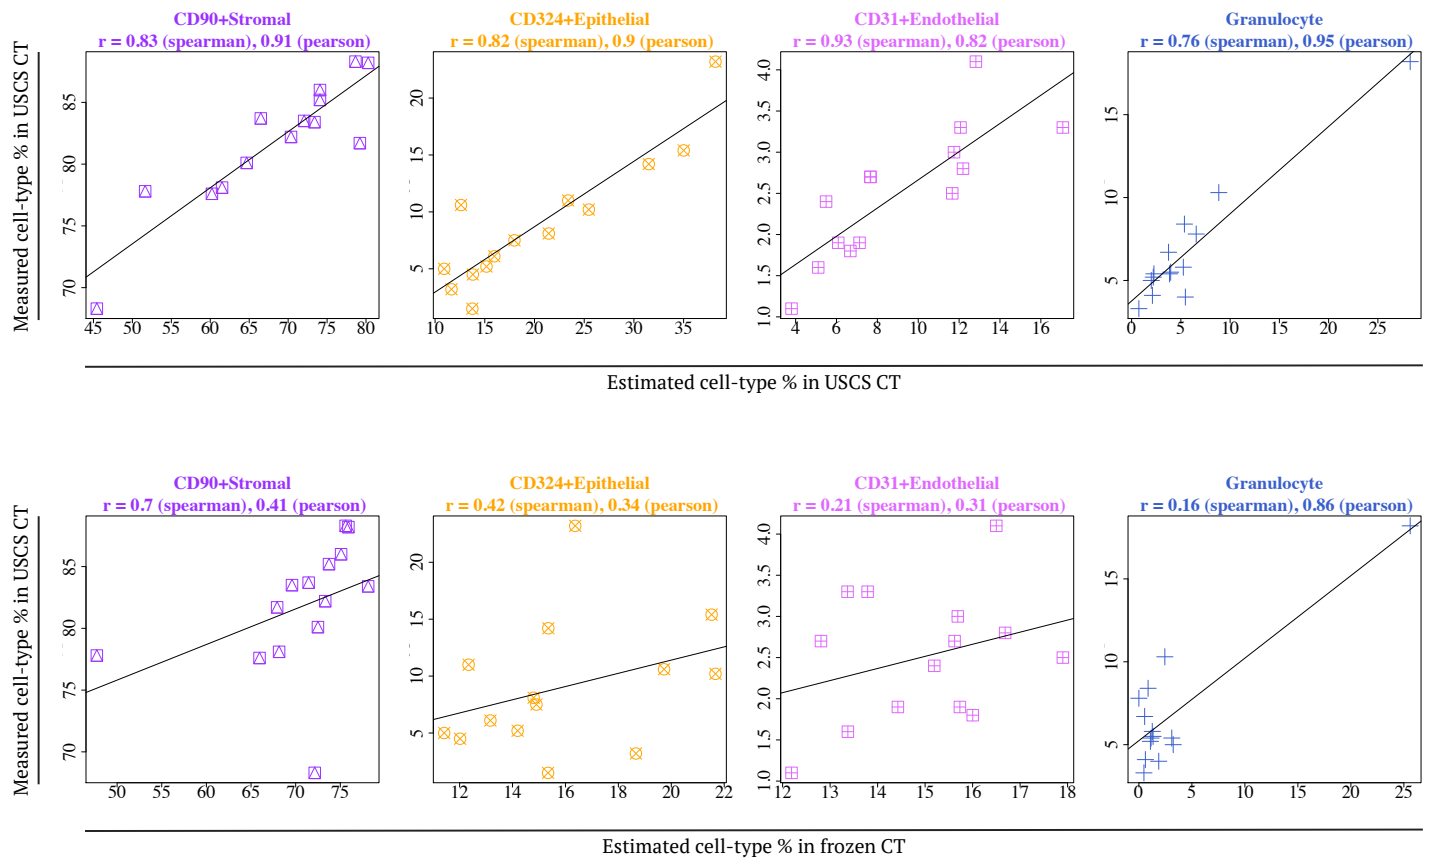

Supplementary Figure B3: **Benchmark reference panel - use of reference panel to capture cell-type composition in non-isolated unsorted single cell suspension (USCS) cord tissue (top panel) and non-isolated frozen cord tissue (bottom panel).** Scatterplots of measured cellular proportions in USCS infant CT (vertical axis) vs. estimated cellular proportions in *USCS* infant CT (horizontal axis, top panel) and *frozen* infant CT (horizontal axis, bottom panel), respectively. Vertical axis gives raw/unscaled measured cell-type % for all cell-types except stromal cells, where the unaccounted measured cell-type % were added to the raw/unscaled measured stromal % so that the 4 measured cell-type % sum to 100%. As cellular proportions could not be measured in frozen CT, estimated cellular proportions in *frozen* CT were compared with cellular proportions in *USCS* CT; however cellular composition in USCS and frozen CT can differ. Cellular proportions were estimated using the reference panel in the current study following the method described by Houseman *et al.* (2012), where pairwise t-tests were used to identify 1,000 cell-type informative CpGs, prioritized by both p-values and directionality of effect sizes (500 CpGs each), that best distinguished each cell-type from the remainder cell-types. Buffy coat from cord blood (CB) was included in the reference panel to capture CB contamination in CT.

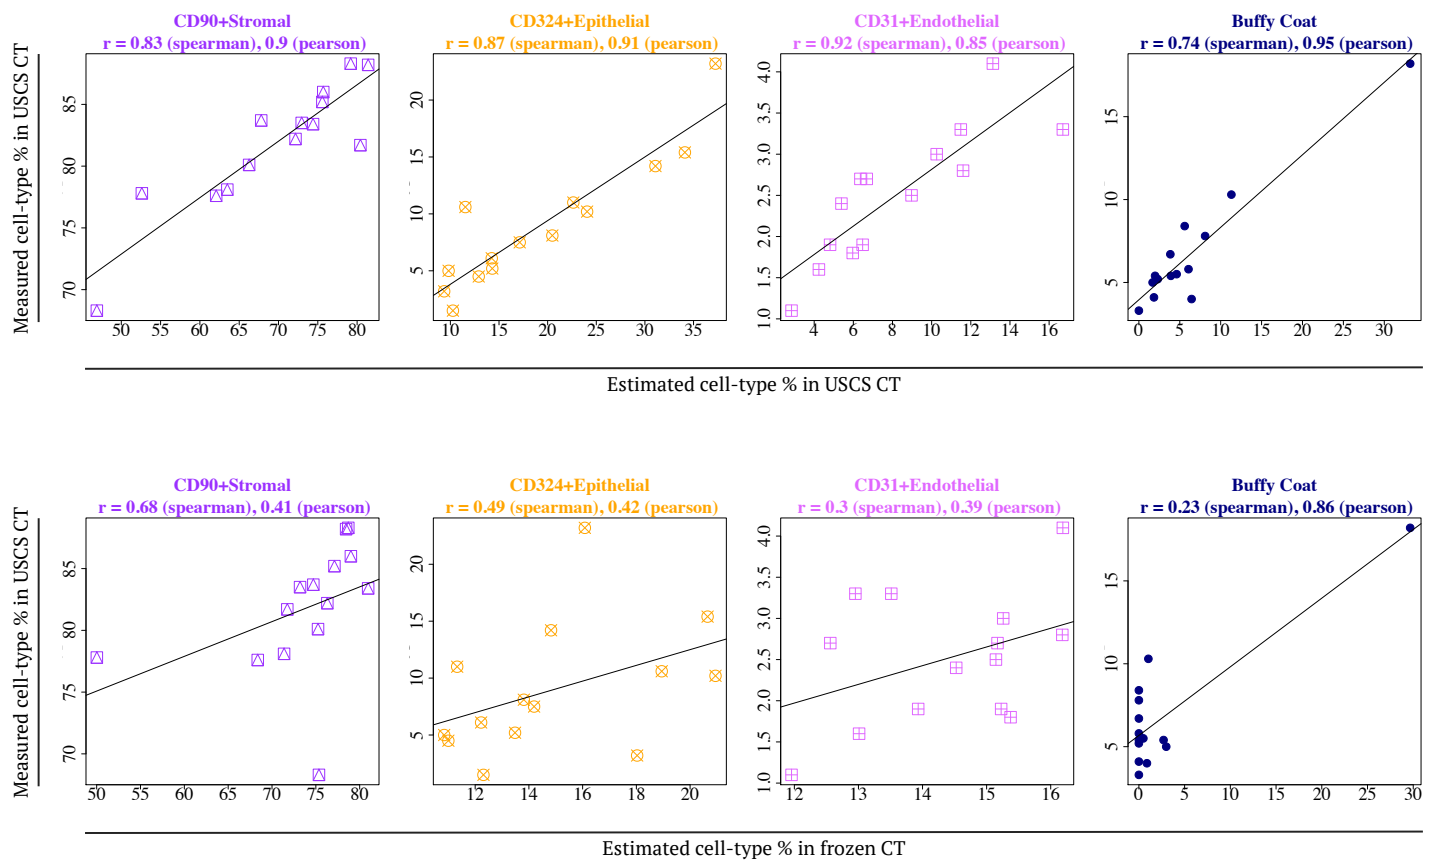

Supplementary Figure B4: **Benchmark reference panel - use of reference panel to capture cell-type composition in non-isolated unsorted single cell suspension (USCS) cord tissue (top panel) and non-isolated frozen cord tissue (bottom panel).** Scatterplots of measured cellular proportions in USCS infant CT (vertical axis) vs. estimated cellular proportions in *USCS* infant CT (horizontal axis, top panel) and *frozen* infant CT (horizontal axis, bottom panel), respectively. Vertical axis gives raw/unscaled measured cell-type % for all cell-types except stromal cells, where the unaccounted measured cell-type % were added to the raw/unscaled measured stromal % so that the 4 measured cell-type % sum to 100%. As cellular proportions could not be measured in frozen CT, estimated cellular proportions in *frozen* CT were compared with cellular proportions in *USCS* CT; however cellular composition in USCS and frozen CT can differ. Cellular proportions were estimated using the reference panel in the current study following the method described by Houseman *et al.* (2012), where pairwise t-tests were used to identify 500 cell-type informative CpGs, prioritized by both p-values and directionality of effect sizes (250 CpGs each), that best distinguished each cell-type from the remainder cell-types. Granulocytes isolated from cord blood (CB) was included in the reference panel to capture CB contamination in CT.

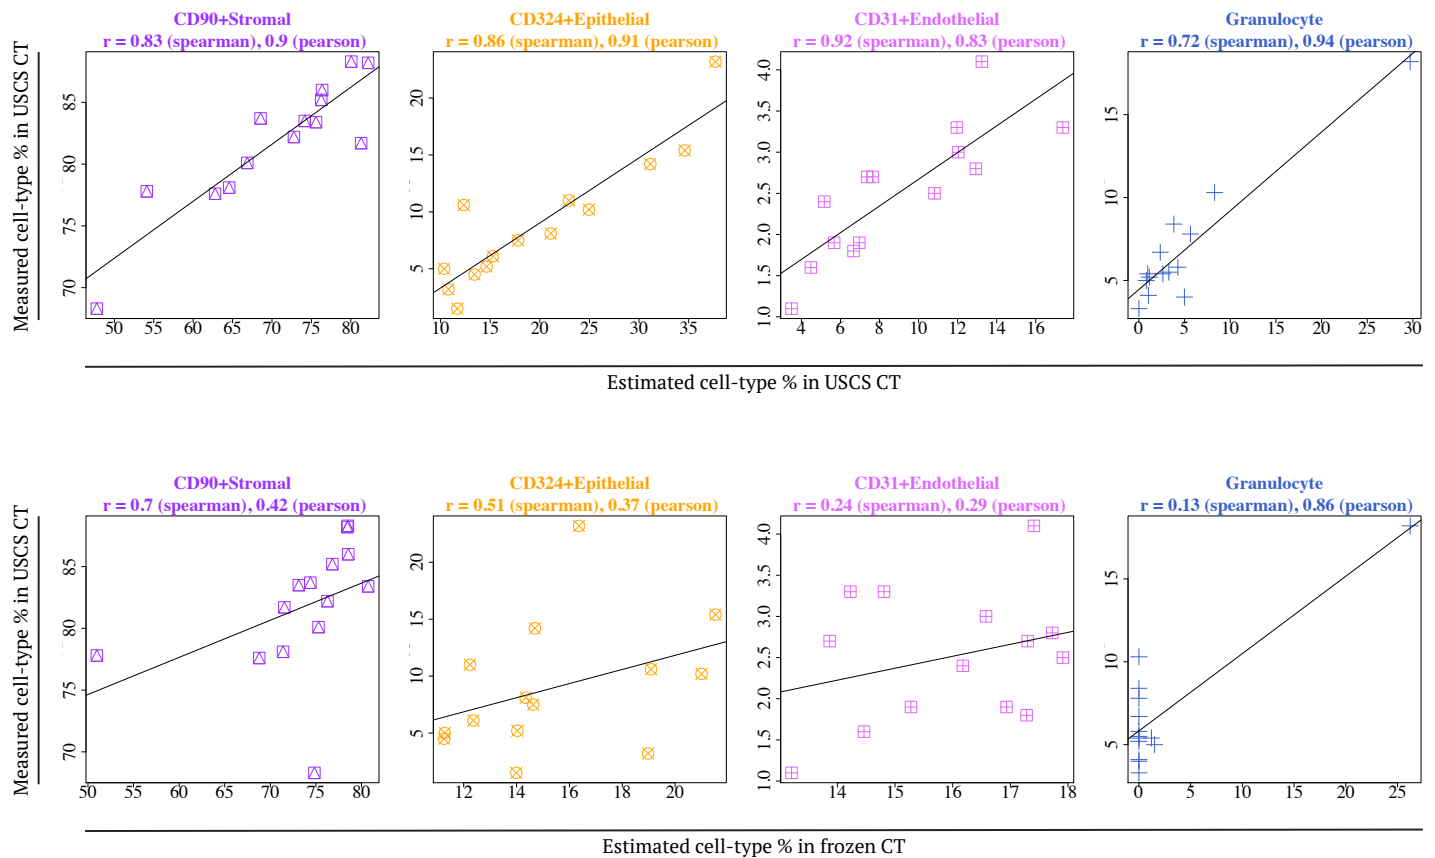

Supplementary Figure B5: **Benchmark reference panel - use of reference panel to capture cell-type composition in non-isolated unsorted single cell suspension (USCS) cord tissue (top panel) and non-isolated frozen cord tissue (bottom panel).** Scatterplots of measured cellular proportions in USCS infant CT (vertical axis) vs. estimated cellular proportions in *USCS* infant CT (horizontal axis, top panel) and *frozen* infant CT (horizontal axis, bottom panel), respectively. Vertical axis gives raw/unscaled measured cell-type % for all cell-types except stromal cells, where the unaccounted measured cell-type % were added to the raw/unscaled measured stromal % so that the 4 measured cell-type % sum to 100%. As cellular proportions could not be measured in frozen CT, estimated cellular proportions in *frozen* CT were compared with cellular proportions in *USCS* CT; however cellular composition in USCS and frozen CT can differ. Cellular proportions were estimated using the reference panel in the current study following the method described by Houseman *et al.* (2012), where pairwise t-tests were used to identify 2,000 cell-type informative CpGs, prioritized by both p-values and directionality of effect sizes (1,000 CpGs each), that best distinguished each cell-type from the remainder cell-types. Granulocytes isolated from cord blood (CB) was included in the reference panel to capture CB contamination in CT.

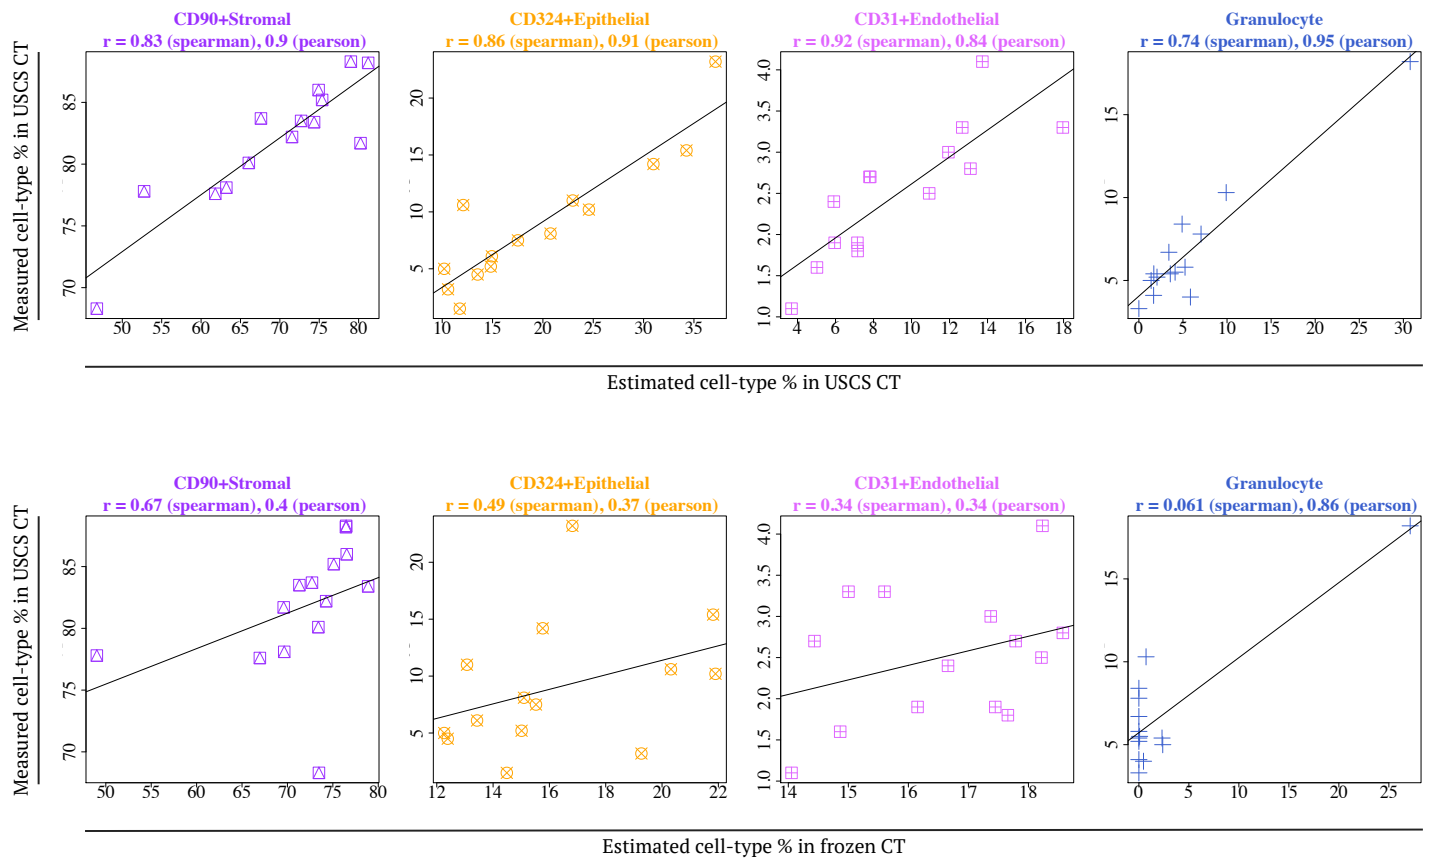

Supplementary Figure B6: **Benchmark reference panel - use of reference panel to capture cell-type composition in non-isolated unsorted single cell suspension (USCS) cord tissue (top panel) and non-isolated frozen cord tissue (bottom panel).** Scatterplots of measured cellular proportions in USCS infant CT (vertical axis) vs. estimated cellular proportions in *USCS* infant CT (horizontal axis, top panel) and *frozen* infant CT (horizontal axis, bottom panel), respectively. Vertical axis gives raw/unscaled measured cell-type % for all cell-types except stromal cells, where the unaccounted measured cell-type % were added to the raw/unscaled measured stromal % so that the 4 measured cell-type % sum to 100%. As cellular proportions could not be measured in frozen CT, estimated cellular proportions in *frozen* CT were compared with cellular proportions in *USCS* CT; however cellular composition in USCS and frozen CT can differ. Cellular proportions were estimated using the reference panel in the current study following the method described by Houseman *et al.* (2012), where pairwise t-tests were used to identify 5,000 cell-type informative CpGs, prioritized by both p-values and directionality of effect sizes (2,500 CpGs each), that best distinguished each cell-type from the remainder cell-types. Granulocytes isolated from cord blood (CB) was included in the reference panel to capture CB contamination in CT.

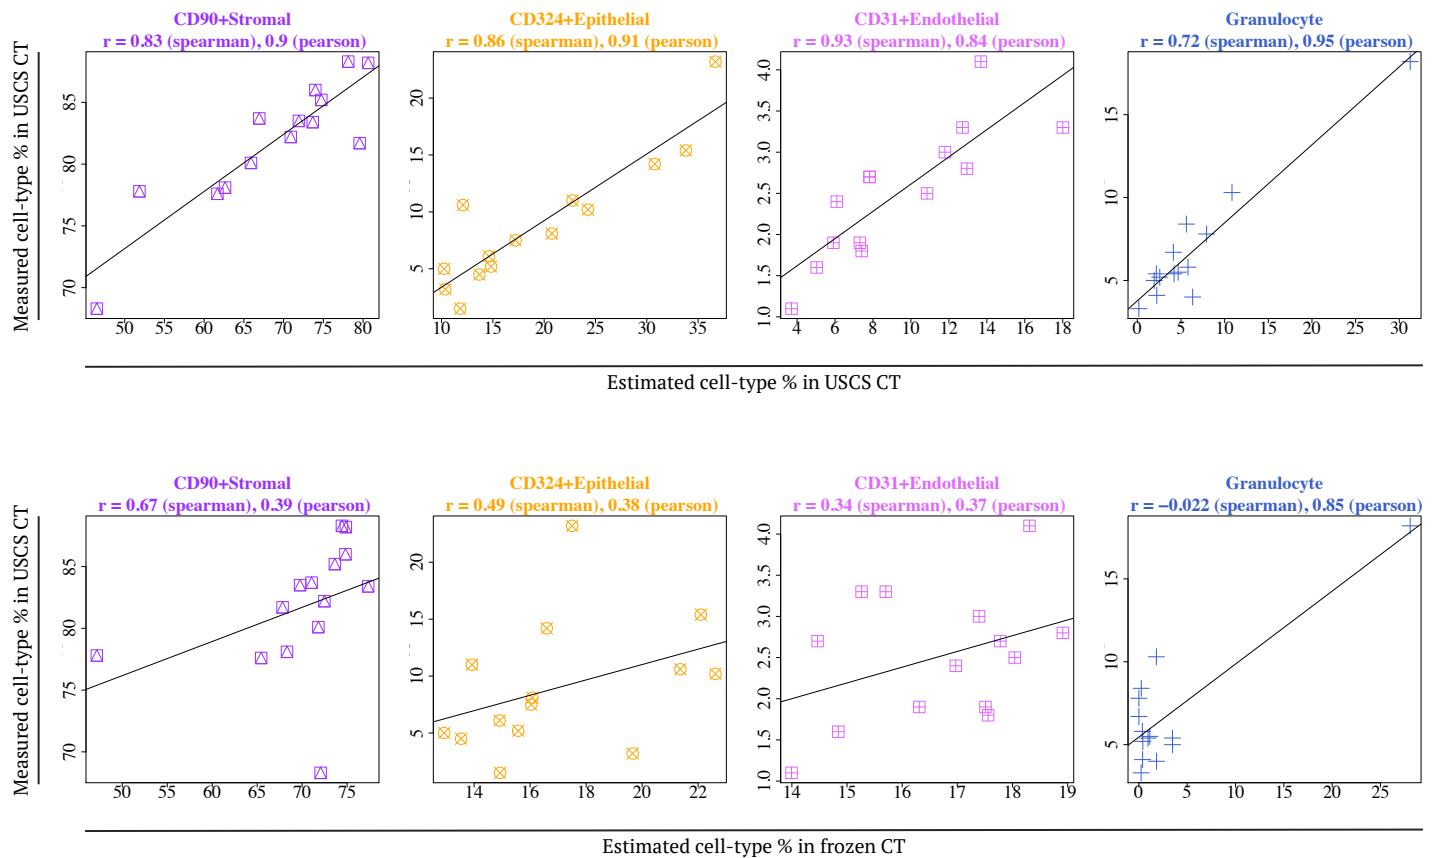

Supplementary Figure B7: **Benchmark reference panel - use of reference panel to capture cell-type composition in non-isolated unsorted single cell suspension (USCS) cord tissue (top panel) and non-isolated frozen cord tissue (bottom panel).** Scatterplots of measured cellular proportions in USCS infant CT (vertical axis) vs. estimated cellular proportions in *USCS* infant CT (horizontal axis, top panel) and *frozen* infant CT (horizontal axis, bottom panel), respectively. Vertical axis gives raw/unscaled measured cell-type % for all cell-types except stromal cells, where the unaccounted measured cell-type % were added to the raw/unscaled measured stromal % so that the 4 measured cell-type % sum to 100%. As cellular proportions could not be measured in frozen CT, estimated cellular proportions in *frozen* CT were compared with cellular proportions in *USCS* CT; however cellular composition in USCS and frozen CT can differ. Cellular proportions were estimated using the reference panel in the current study following the method described by Houseman *et al.* (2012), where pairwise t-tests were used to identify 10,000 cell-type informative CpGs, prioritized by both p-values and directionality of effect sizes (5,000 CpGs each), that best distinguished each cell-type from the remainder cell-types. Granulocytes isolated from cord blood (CB) was included in the reference panel to capture CB contamination in CT.

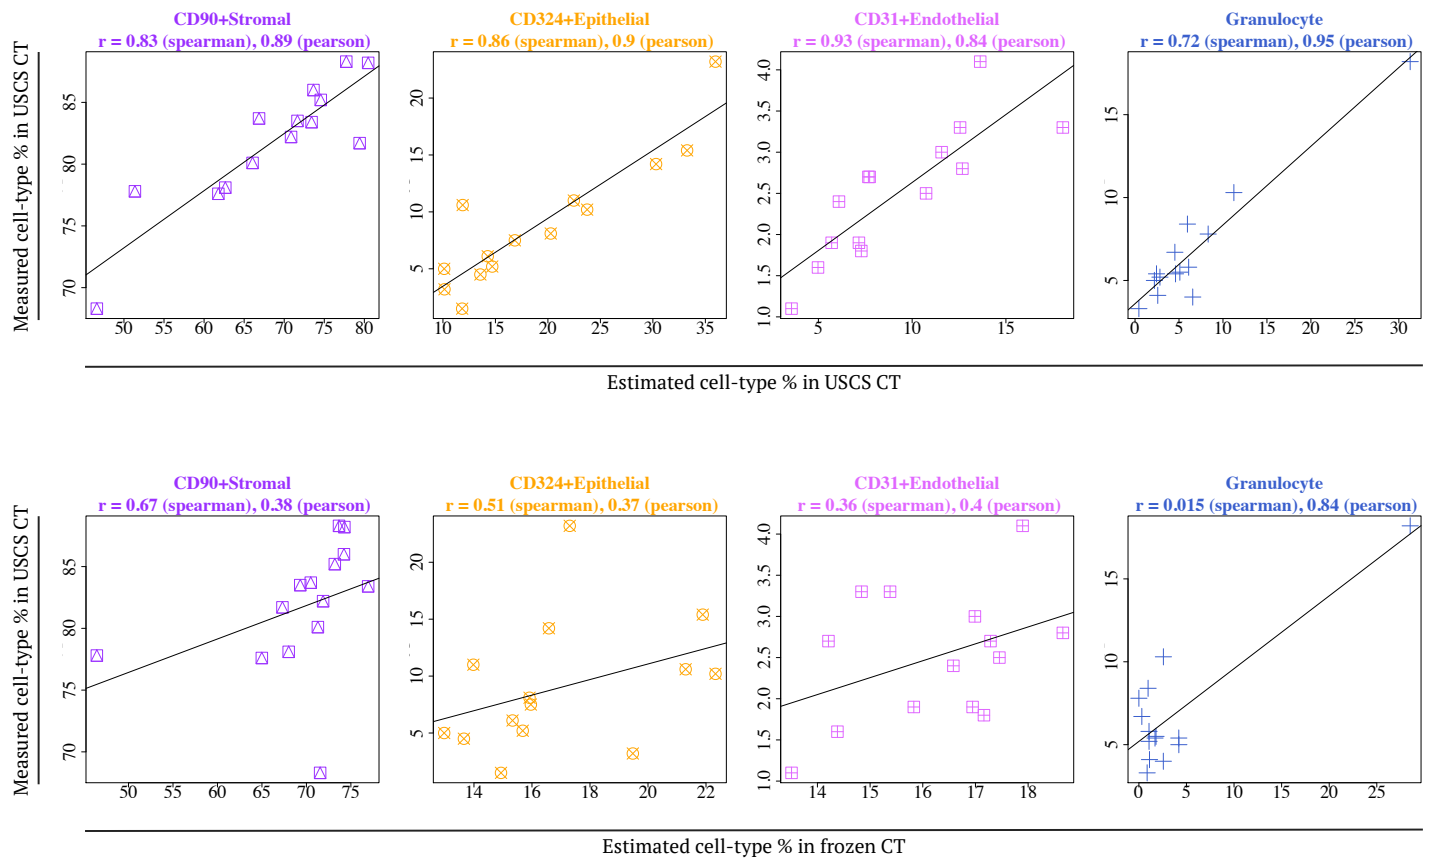

Supplementary Figure B8: **Benchmark reference panel - use of reference panel to capture cell-type composition in non-isolated unsorted single cell suspension (USCS) cord tissue (top panel) and non-isolated frozen cord tissue (bottom panel).** Scatterplots of measured cellular proportions in USCS infant CT (vertical axis) vs. estimated cellular proportions in *USCS* infant CT (horizontal axis, top panel) and *frozen* infant CT (horizontal axis, bottom panel), respectively. Vertical axis gives raw/unscaled measured cell-type % for all cell-types except stromal cells, where the unaccounted measured cell-type % were added to the raw/unscaled measured stromal % so that the 4 measured cell-type % sum to 100%. As cellular proportions could not be measured in frozen CT, estimated cellular proportions in *frozen* CT were compared with cellular proportions in *USCS* CT; however cellular composition in USCS and frozen CT can differ. Cellular proportions were estimated using the reference panel in the current study following the method described by Houseman *et al.* (2012), where pairwise t-tests were used to identify 1,000 cell-type informative CpGs, prioritized by both p-values and directionality of effect sizes (500 CpGs each), that best distinguished each cell-type from the remainder cell-types. When there is no cord blood (e.g. granulocytes) representation on the reference panel, the estimated cellular proportions for stromal and endothelial cells seem similar to before, and proportions previously attributed to “granulocytes” (blood) seem to be “attributed” to epithelial cells. The graph shows estimated cellular proportion for epithelial vs. measured epithelial composition + measured blood composition.

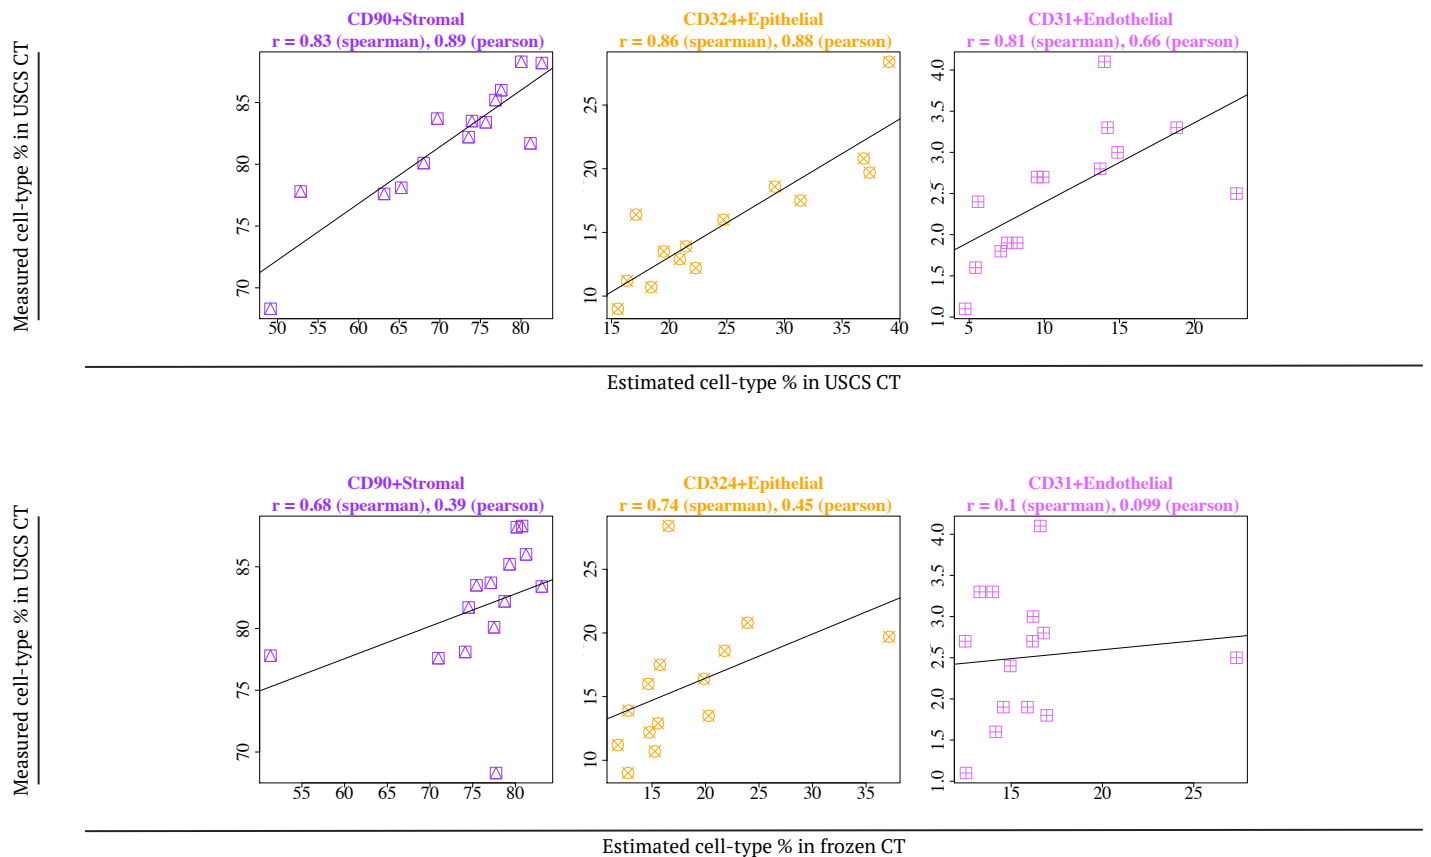

Supplementary Figure B9: **Methylation levels at cg22286764 (*C3orf35*), cg05684195 (*CIDEA*) and the resulting Epi-MSA score for 14 CD90+ stromal cells.** The Epi-MSA score is defined as the difference in methylation beta values between the 2 CpGs (where methylation beta values are represented on a 0-1 scale). A negative Epi-MSA score indicates fibroblast cells, while a positive score represents MSCs. When applied to CD90+ stromal cells isolated from CT, 11 of the 14 samples had a score below 0, while 3 samples had score greater than but close to 0, suggesting that proportion of fibroblasts exceeds the proportion of MSCs (slightly) in our CD90+ stromal cells pool. However, the Epi-MSA score was constructed from the methylomes of cultured fibroblasts and MSCs, and may not be applicable to non-cultured cell-types.

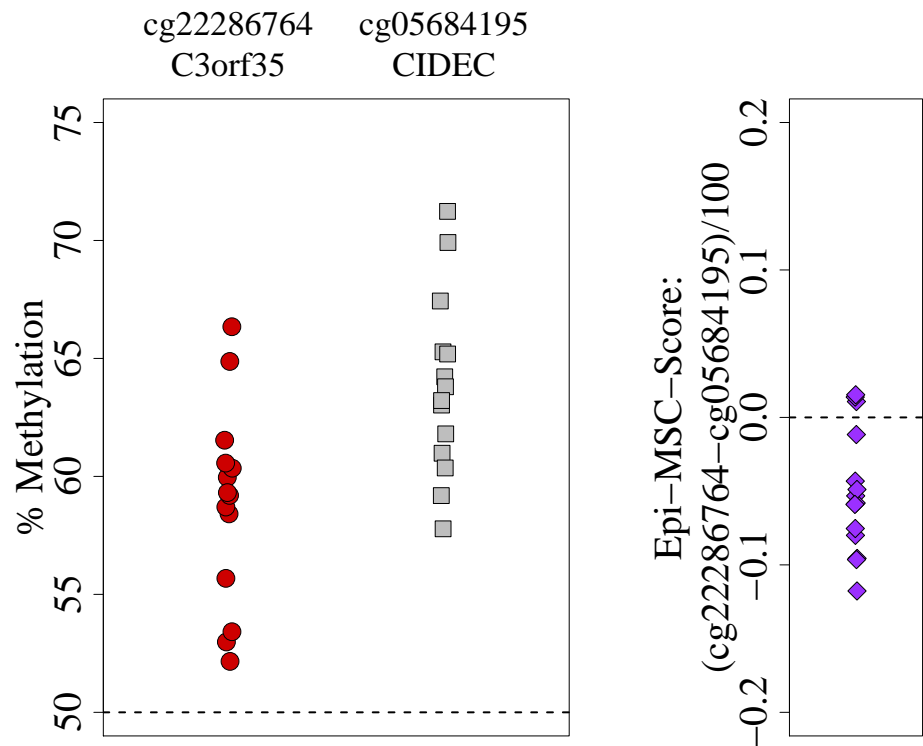

Supplementary Table B1: **Benchmark reference panel - use of reference panel to capture cell-type composition in non-isolated unsorted single cell suspension (USCS) (second column) and non-isolated frozen (third column) cord tissue (CT).** The numbers in the second column give normalized root-mean-square error (RMSE) comparing measured cell-type % in *USCS CT* vs. estimated cell-type % in *USCS CT*. The numbers in the third column give normalized RMSE comparing measured cell-type % in *USCS CT* vs. estimated cell-type % in *frozen CT*. The RMSE was normalized by the interquartile range of the measured cell-type composition in *USCS CT*. Raw/unscaled measured cell-type % were used for all cell-types except stromal cells, where the unaccounted measured cell-type % were added to the raw/unscaled measured stromal % so that the 4 measured cell-type % sum to 100%. As cellular proportions could not be measured in frozen CT, estimated cellular proportions in *frozen CT* were compared with cellular proportions in *USCS CT*; however cellular composition in USCS and frozen CT can differ. Cellular proportions were estimated using the reference panel in the current study following the method described by Houseman *et al.* (2012), where pairwise t-tests were used to identify 1000 cell-type informative CpGs, prioritized by both p-values and directionality of effect sizes (500 CpGs each), that best distinguished each cell-type from the remainder cell-types. Granulocytes isolated from cord blood (CB) were included in the reference panel to capture CB contamination in CT.

| Cell-type        | USCS CT | Frozen CT |
|------------------|---------|-----------|
| CD90+Stromal     | 2.15    | 1.77      |
| CD324+Epithelial | 2.01    | 1.41      |
| CD31+Endothelial | 7.04    | 13.24     |
| Granulocyte      | 1.72    | 2.50      |

Supplementary Figure C1: **Benchmark reference panel - use of 4 reference panels to capture cell-type composition in cord blood buffy coat.** Scatterplots of measured cell-type % in *unsorted leukocytes* (vertical axis) vs. estimated cell-type % in *buffy coat* (horizontal axis), using each of the 4 reference panels. Vertical axis gives raw/unscaled measured cell-type % for all cell-types except granulocytes, where the unaccounted measured cell-type % were added to the raw/unscaled measured granulocytes % so that the 6 measured cell-type % sum to 100%. Cellular composition was estimated using each reference panel following the method described by Houseman *et al.* (2012), where pairwise t-tests were used to identify 1,000 cell-type informative CpGs, prioritized by only p-values, that best distinguished each cell-type from the remainder cell-types. As cellular composition was not measured in buffy coat, estimated cellular composition in *buffy coat* was compared with cellular composition measured in *unsorted leukocytes*; however cellular composition in the 2 can differ.

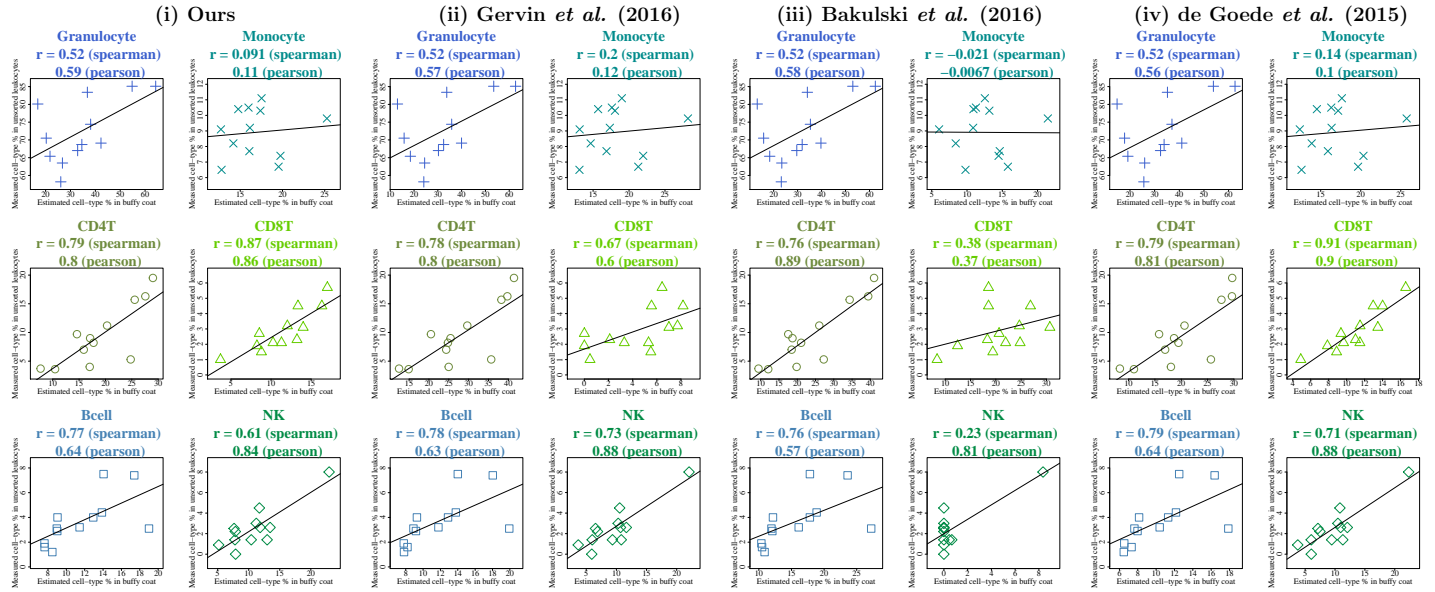

Supplementary Table C1: **Benchmark reference panel - use of 4 reference panels to capture cell-type composition in cord blood unsorted leukocytes**. The numbers in the table gives normalized root-mean-square error (RMSE) comparing measured cell-type % in *unsorted leukocytes* vs. estimated cell-type % in *unsorted leukocytes*, using each of the 4 reference panels. The RMSE was normalized by the interquartile range of the measured cell-type composition. The raw/unscaled measured cell-type % was used for all cell-types except granulocytes, where the unaccounted measured cell-type % were added to the raw/unscaled measured granulocytes % so that the 6 measured cell-type % sum to 100%. Cellular composition was estimated using each reference panel following the method described by Houseman *et al.* (2012), where pairwise t-tests were used to identify 1,000 cell-type informative CpGs, prioritized by only p-values, that best distinguished each cell-type from the remainder cell-types.

| Cell-type   | Current study | Gervin <i>at al.</i> (2016) | Bakulski <i>at al.</i> (2016) | de Goede <i>at al.</i> (2015) |
|-------------|---------------|-----------------------------|-------------------------------|-------------------------------|
| Granulocyte | 1.06          | 1.17                        | 1.16                          | 1.12                          |
| Monocyte    | 1.32          | 1.45                        | 0.87                          | 1.24                          |
| CD4T        | 0.30          | 0.87                        | 0.55                          | 0.33                          |
| CD8T        | 1.74          | 0.99                        | 5.12                          | 2.00                          |
| Bcell       | 2.83          | 3.01                        | 4.81                          | 2.17                          |
| NK          | 3.68          | 2.87                        | 1.66                          | 2.79                          |

Supplementary Table C2: **Benchmark reference panel - use of 4 reference panels to capture cell-type composition in cord blood buffy coat**. The numbers in the table gives normalized root-mean-square error (RMSE) comparing measured cell-type % in *unsorted leukocytes* vs. estimated cell-type % in *buffy coat*, using each of the 4 reference panels. The RMSE was normalized by the interquartile range of the measured cell-type composition. The raw/unscaled measured cell-type % was used for all cell-types except granulocytes, where the unaccounted measured cell-type % were added to the raw/unscaled measured granulocytes % so that the 6 measured cell-type % sum to 100%. Cellular composition was estimated using each reference panel following the method described by Houseman *et al.* (2012), where pairwise t-tests were used to identify 1,000 cell-type informative CpGs, prioritized by only p-values, that best distinguished each cell-type from the remainder cell-types. As cellular composition was not measured in buffy coat, estimated cellular composition in *buffy coat* was compared with cellular composition measured in *unsorted leukocytes* ; however cellular composition in the 2 can differ.

| Cell-type   | Current study | Gervin <i>at al.</i> (2016) | Bakulski <i>at al.</i> (2016) | de Goede <i>at al.</i> (2015) |
|-------------|---------------|-----------------------------|-------------------------------|-------------------------------|
| Granulocyte | 2.76          | 2.94                        | 2.96                          | 2.85                          |
| Monocyte    | 3.21          | 3.73                        | 2.00                          | 3.26                          |
| CD4T        | 1.40          | 2.61                        | 2.10                          | 1.55                          |
| CD8T        | 6.03          | 1.85                        | 12.47                         | 5.63                          |
| Bcell       | 5.81          | 5.98                        | 8.88                          | 5.02                          |
| NK          | 6.81          | 5.83                        | 1.69                          | 6.03                          |

Supplementary Table D1: **List of primary tissues/cells and primary Cultures/Embryonic Stem (ES) cell derived samples profiled using reduced representation bisulfite sequencing (RRBS) in the Epigenome Roadmap project. Samples with high missing rates were excluded.**

| Primary Tissues/Cells  |      |                                          |
|------------------------|------|------------------------------------------|
| Cell type/tissue group | EID  | Epigenome name                           |
| Blood                  | E030 | Primary neutrophils (from PB)            |
| Blood                  | E031 | Primary B cells from cord blood          |
| Blood                  | E035 | Primary haematopoietic stem cells (HSCs) |
| Blood                  | E050 | Primary HSCs G-CSF-mobilized female      |
| Blood                  | E051 | Primary HSCs G-CSF-mobilized male        |
| Brain                  | E068 | Brain anterior caudate                   |
| Brain                  | E069 | Brain cingulate gyrus                    |
| Brain                  | E072 | Brain inferior temporal lobe             |
| Brain                  | E073 | Brain dorsolateral prefrontal cortex     |
| Brain                  | E074 | Brain substantia nigra                   |
| Digestive              | E075 | Colonic mucosa                           |
| Smooth Muscle          | E076 | Colon smooth muscle                      |
| Digestive              | E077 | Duodenum mucosa                          |
| Brain, fetal           | E081 | Fetal brain male                         |
| Heart, fetal           | E083 | Fetal heart                              |
| Kidney, fetal          | E086 |                                          |
| Pancreas               | E087 | Pancreatic islets                        |
| Lung, fetal            | E088 |                                          |
| Digestive              | E101 | Rectal mucosa donor 29                   |
| Digestive              | E102 | Rectal mucosa donor 31                   |
| Smooth Muscle          | E103 | Rectal smooth muscle                     |
| Muscle                 | E107 | Skeletal muscle male                     |
| Muscle                 | E108 | Skeletal muscle female                   |
| Digestive              | E110 | Stomach mucosa                           |
| Smooth Muscle          | E111 | Stomach smooth muscle                    |

| Primary Cultures/Embryonic Stem (ES) cell derived |      |                                               |
|---------------------------------------------------|------|-----------------------------------------------|
| Cell type/tissue group                            | EID  | Epigenome name                                |
| ES cell                                           | E002 | ES-WA7 cells                                  |
| ES cell                                           | E003 | H1 cells                                      |
| ES cell                                           | E008 | H9 cells                                      |
| ES cell                                           | E014 | HUES48 cells                                  |
| ES cell                                           | E015 | HUES6 cells                                   |
| ES deriv                                          | E009 | H9 derived neuronal progenitor cultured cells |
| ES deriv                                          | E010 | H9 derived neuron cultured cells              |
| ES deriv                                          | E011 | HUES64 derived CD184+ endoderm                |
| iPSC                                              | E018 | iPS-15b cells                                 |
| iPSC                                              | E019 | iPS-18 cells                                  |
| iPSC                                              | E020 | iPS-20b cells                                 |
| Mesench                                           | E026 | Bone marrow derived MSCs                      |
| Mesench                                           | E049 | Mesenchymal stem cell deriv. chondrocyte      |

Supplementary Table D2: **List of primary tissues/cells and primary Cultures/Embryonic Stem (ES) cell derived samples profiled using whole genome bisulfite sequencing (WGBS) in the Epigenome Roadmap project. Samples with high missing rates were excluded.**

| Cell type/tissue group | EID  | Epigenome name                      |
|------------------------|------|-------------------------------------|
| HSC                    | E050 | Primary HSCs G-CSF mobilized female |
| Heart                  | E065 | Aorta                               |
| Liver                  | E066 |                                     |
| Brain                  | E070 | Brain germinal matrix               |
| Brain                  | E071 | Brain hippocampus middle            |
| Digestive              | E079 | Oesophagus                          |
| Digestive              | E094 | Gastic                              |
| Heart                  | E095 | Left ventricle                      |
| Lung                   | E096 |                                     |
| Ovary                  | E097 |                                     |
| Pancreas               | E098 |                                     |
| Muscle                 | E100 | Psoas muscle                        |
| Heart                  | E104 | Right atrium                        |
| Heart                  | E105 | Right ventricle                     |
| Digestive              | E106 | Sigmoid colon                       |
| Digestive              | E109 | Small intestine                     |
| Thymus                 | E112 |                                     |
| Spleen                 | E113 |                                     |

| Primary Cultures/Embryonic Stem (ES) cell derived |      |                                               |
|---------------------------------------------------|------|-----------------------------------------------|
| Cell type/tissue group                            | EID  | Epigenome name                                |
| ES cell                                           | E003 | H1 cells                                      |
| ES cell                                           | E008 | H9 cells                                      |
| ES cell                                           | E016 | HUES64 cells                                  |
| ES deriv                                          | E004 | H1 BMP4 derived mesendoderm                   |
| ES deriv                                          | E005 | H1 BMP4 derived trophoblast                   |
| ES deriv                                          | E006 | H1 derived mesenchymal stem cells             |
| ES deriv                                          | E007 | H1 derived neuronal progenitor cultured cells |
| ES deriv                                          | E011 | HUES64 derived CD184+ endoderm                |
| ES deriv                                          | E012 | HUES64 derived CD56+ ectoderm                 |
| ES deriv                                          | E013 | HUES64 derived CD56+ mesoderm                 |
| IMR90                                             | E017 | IMR90 fetal lung fibroblasts                  |
| iPSC                                              | E021 | iPS DF 6.9 cells                              |
| iPSC                                              | E022 | iPS DF 19.11 cells                            |
| Neurosphere                                       | E053 | Cortex derived neurospheres                   |
| Neurosphere                                       | E054 | Ganglion eminence derived neurospheres        |
| Epithelial                                        | E058 | Foreskin keratinocyte                         |

Supplementary Figure D1: **Comparison of Epigenome Roadmap samples with isolated cell-types from cord tissue (CT), cord blood (CB) and non-isolated infant CT/CB tissues.** Heatmap (number and color) represents spearman correlation between CT/CB samples and 34 Epigenome Roadmap samples profiled using whole genome bisulfite sequencing (WGBS). Each column represents each of the 9 isolated CT/CB cell-type populations or 4 non-isolated infant CT/CB tissues. Each row represents each sample from the Epigenome Roadmap project. Spearman correlation is represented on 0-100 scale, and color in heatmap changes from grey to blue as correlation increases. Dendrogram shows hierarchical clustering of Epigenome Roadmap samples. Color in dendrogram represents germinal origins of samples from the Epigenome Roadmap project. Primary tissues/cells of mesodermic (MSC-derived), mesodermic (HSC-derived), endodermic and ectodermic germinal origins are represented in light purple, light turquoise, light yellow and grey, respectively. Embryonic stem (ES) cell derived and primary culture samples are represented in light red.

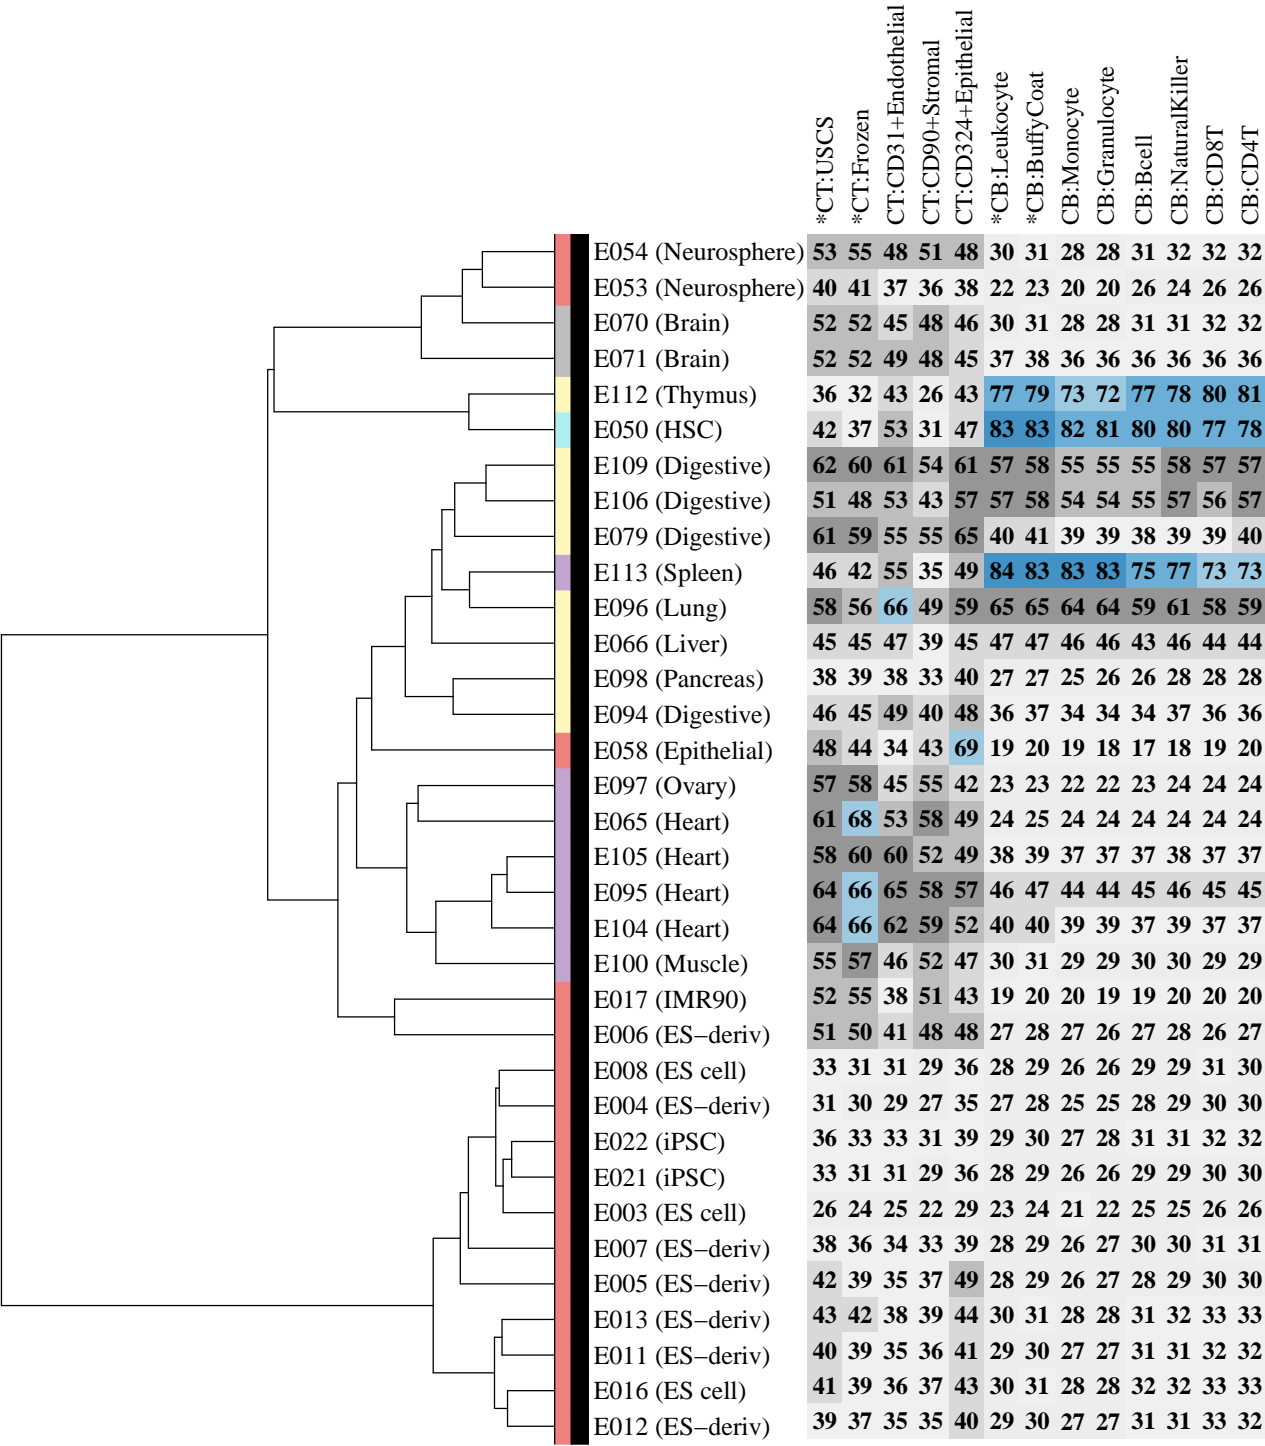

Supplementary Table D3: **Comparison of inter-individual variation in cell-types/tissues from cord tissue and cord blood - cell-types/tissues from cord tissue were more variable than those from cord blood.** For each isolated cell-type or non-isolated tissue, the inter-quartile range (IQR) in % methylation was computed using 10 samples which had DNA methylation profiled across all 13 cell-types/tissues. First column gives the % methylation IQR value and the remainder columns give the proportions of CpGs with % methylation IQR exceeding the value in the first column for each cell-type/tissue.

| %meth IQR | *C/T:USCS | *C/T:Frozen | C/T:CD31+Endothelial | C/T:CD90+Stromal | C/T:CD324+Epithelial | *CB:Leukocyte | *CB:BuFFyCoat | CB:Mono | CB:Gran | CB:Bcell | CB:NK | CB:CD8T | CB:CD4T |
|-----------|-----------|-------------|----------------------|------------------|----------------------|---------------|---------------|---------|---------|----------|-------|---------|---------|
| 0         | 1.0       | 1.0         | 1.0                  | 1.0              | 1.0                  | 1.0           | 1.0           | 1.0     | 1.0     | 1.0      | 1.0   | 1.0     | 1.0     |
| 1         | 0.72      | 0.76        | 0.69                 | 0.70             | 0.71                 | 0.64          | 0.69          | 0.56    | 0.60    | 0.55     | 0.59  | 0.56    | 0.58    |
| 2         | 0.50      | 0.53        | 0.45                 | 0.44             | 0.51                 | 0.36          | 0.41          | 0.29    | 0.31    | 0.28     | 0.31  | 0.29    | 0.30    |
| 3         | 0.34      | 0.36        | 0.31                 | 0.28             | 0.38                 | 0.22          | 0.25          | 0.17    | 0.18    | 0.17     | 0.19  | 0.18    | 0.18    |
| 4         | 0.23      | 0.23        | 0.22                 | 0.18             | 0.30                 | 0.14          | 0.16          | 0.11    | 0.11    | 0.11     | 0.12  | 0.11    | 0.11    |
| 5         | 0.16      | 0.14        | 0.16                 | 0.11             | 0.23                 | 0.094         | 0.11          | 0.068   | 0.069   | 0.071    | 0.075 | 0.072   | 0.073   |
| 6         | 0.10      | 0.091       | 0.11                 | 0.075            | 0.19                 | 0.063         | 0.074         | 0.046   | 0.046   | 0.048    | 0.049 | 0.048   | 0.048   |
| 7         | 0.066     | 0.059       | 0.080                | 0.050            | 0.15                 | 0.043         | 0.051         | 0.032   | 0.032   | 0.033    | 0.033 | 0.032   | 0.033   |
| 8         | 0.042     | 0.038       | 0.058                | 0.033            | 0.12                 | 0.029         | 0.036         | 0.023   | 0.023   | 0.024    | 0.023 | 0.023   | 0.023   |
| 9         | 0.027     | 0.026       | 0.042                | 0.023            | 0.097                | 0.020         | 0.025         | 0.017   | 0.017   | 0.017    | 0.017 | 0.017   | 0.017   |
| 10        | 0.017     | 0.017       | 0.031                | 0.016            | 0.078                | 0.015         | 0.018         | 0.013   | 0.013   | 0.013    | 0.013 | 0.012   | 0.012   |

Supplementary Table E1: **CpGs variably methylated across isolated cell-types in cord tissue (CT) were enriched for intercellular matrix pathways.** F-tests were used to identify cell-type specific CpGs in CT. A KEGG enrichment analysis was performed for the top 1000 cell-type specific CpGs (smallest p-values), using an adapted Goseq procedure implemented in the missMethyl R package, that accounts for the non-random selection/number of probes of each gene represented on the array. We report pathways at a false discovery rate of 0.01 and with number of genes (N) in the KEGG pathway  $\leq 150$ .

| Identifier | Pathway                                                                 | N   | DE | P.DE    | FDR     |
|------------|-------------------------------------------------------------------------|-----|----|---------|---------|
| hsa04933   | AGE-RAGE signaling pathway in diabetic complications                    | 96  | 11 | 2.7e-09 | 2.1e-07 |
| hsa00532   | Glycosaminoglycan biosynthesis - chondroitin sulfate / dermatan sulfate | 19  | 6  | 2.7e-08 | 1.2e-06 |
| hsa04072   | Phospholipase D signaling pathway                                       | 140 | 12 | 9.9e-08 | 3.4e-06 |
| hsa04270   | Vascular smooth muscle contraction                                      | 118 | 10 | 2.2e-07 | 6.2e-06 |
| hsa04012   | ErbB signaling pathway                                                  | 84  | 9  | 7.2e-07 | 1.5e-05 |
| hsa04611   | Platelet activation                                                     | 121 | 9  | 3.5e-06 | 5.5e-05 |
| hsa05146   | Amoebiasis                                                              | 94  | 8  | 4.2e-06 | 6.2e-05 |
| hsa04066   | HIF-1 signaling pathway                                                 | 98  | 8  | 6.1e-06 | 8.3e-05 |
| hsa01521   | EGFR tyrosine kinase inhibitor resistance                               | 79  | 8  | 6.8e-06 | 8.7e-05 |
| hsa04666   | Fc gamma R-mediated phagocytosis                                        | 91  | 8  | 7.1e-06 | 8.7e-05 |
| hsa05323   | Rheumatoid arthritis                                                    | 86  | 6  | 7.2e-06 | 8.7e-05 |
| hsa04750   | Inflammatory mediator regulation of TRP channels                        | 98  | 8  | 1.5e-05 | 1.7e-04 |
| hsa04971   | Gastric acid secretion                                                  | 74  | 7  | 1.6e-05 | 1.7e-04 |
| hsa05100   | Bacterial invasion of epithelial cells                                  | 76  | 7  | 2.1e-05 | 2.2e-04 |
| hsa04650   | Natural killer cell mediated cytotoxicity                               | 120 | 7  | 2.9e-05 | 3.0e-04 |
| hsa05162   | Measles                                                                 | 123 | 7  | 3.2e-05 | 3.2e-04 |
| hsa04142   | Lysosome                                                                | 118 | 7  | 3.5e-05 | 3.3e-04 |
| hsa05211   | Renal cell carcinoma                                                    | 64  | 6  | 4.8e-05 | 4.3e-04 |
| hsa00240   | Pyrimidine metabolism                                                   | 100 | 6  | 5.7e-05 | 4.9e-04 |
| hsa04725   | Cholinergic synapse                                                     | 110 | 8  | 5.9e-05 | 5.0e-04 |
| hsa05231   | Choline metabolism in cancer                                            | 98  | 7  | 9.1e-05 | 7.4e-04 |
| hsa04068   | FoxO signaling pathway                                                  | 130 | 7  | 1.4e-04 | 1.1e-03 |
| hsa04261   | Adrenergic signaling in cardiomyocytes                                  | 144 | 8  | 1.6e-04 | 1.3e-03 |
| hsa04722   | Neurotrophin signaling pathway                                          | 116 | 7  | 1.9e-04 | 1.4e-03 |
| hsa05120   | Epithelial cell signaling in Helicobacter pylori infection              | 66  | 5  | 2.0e-04 | 1.5e-03 |
| hsa04071   | Sphingolipid signaling pathway                                          | 119 | 7  | 2.1e-04 | 1.5e-03 |
| hsa05161   | Hepatitis B                                                             | 137 | 7  | 2.4e-04 | 1.6e-03 |
| hsa04520   | Adherens junction                                                       | 71  | 6  | 2.9e-04 | 1.9e-03 |
| hsa04911   | Insulin secretion                                                       | 82  | 6  | 3.5e-04 | 2.2e-03 |
| hsa04912   | GnRH signaling pathway                                                  | 90  | 6  | 3.7e-04 | 2.2e-03 |
| hsa04370   | VEGF signaling pathway                                                  | 61  | 5  | 4.3e-04 | 2.5e-03 |
| hsa04310   | Wnt signaling pathway                                                   | 139 | 7  | 6.1e-04 | 3.5e-03 |
| hsa05321   | Inflammatory bowel disease (IBD)                                        | 61  | 4  | 6.3e-04 | 3.5e-03 |
| hsa04150   | mTOR signaling pathway                                                  | 150 | 7  | 6.7e-04 | 3.7e-03 |
| hsa00760   | Nicotinate and nicotinamide metabolism                                  | 29  | 3  | 8.5e-04 | 4.5e-03 |
| hsa05110   | Vibrio cholerae infection                                               | 50  | 4  | 8.6e-04 | 4.5e-03 |
| hsa05014   | Amyotrophic lateral sclerosis (ALS)                                     | 51  | 4  | 1.0e-03 | 5.3e-03 |
| hsa04970   | Salivary secretion                                                      | 84  | 5  | 1.0e-03 | 5.3e-03 |
| hsa05214   | Glioma                                                                  | 65  | 5  | 1.1e-03 | 5.5e-03 |
| hsa00480   | Glutathione metabolism                                                  | 52  | 3  | 1.2e-03 | 5.9e-03 |
| hsa05220   | Chronic myeloid leukemia                                                | 71  | 5  | 1.3e-03 | 6.1e-03 |
| hsa04330   | Notch signaling pathway                                                 | 48  | 4  | 1.5e-03 | 6.9e-03 |
| hsa04961   | Endocrine and other factor-regulated calcium reabsorption               | 46  | 4  | 1.5e-03 | 6.9e-03 |
| hsa05142   | Chagas disease (American trypanosomiasis)                               | 102 | 5  | 1.7e-03 | 7.6e-03 |
| hsa04550   | Signaling pathways regulating pluripotency of stem cells                | 139 | 6  | 1.9e-03 | 8.3e-03 |
| hsa04668   | TNF signaling pathway                                                   | 108 | 5  | 1.9e-03 | 8.3e-03 |
| hsa04919   | Thyroid hormone signaling pathway                                       | 114 | 6  | 1.9e-03 | 8.4e-03 |
| hsa04540   | Gap junction                                                            | 87  | 5  | 2.0e-03 | 8.4e-03 |
